# Supplementary material for: Statistical analysis plan for the ‘Efficacy of Nitric Oxide in Stroke’ (ENOS) trial
Source: PubMed Central journal article supplement (PMC4235425; doi:10.1111/ijs.12235), 2014-03-03
Supplement: ijs0009-0372-sd1.pdf [file ijs0009-0372-sd1.pdf]

**STATISTICAL ANALYSIS PLAN**

**The Efficacy of Nitric Oxide in Stroke (ENOS) trial**

Philip MW Bath, Aimee Houlton, Nikola Sprigg, Joanna Wardlaw, Stuart Pocock, on behalf of the ENOS Trialists

Author for correspondence:

Professor Philip M W Bath, MD FRCPath FRCP

Stroke Trials Unit, Division of Clinical Neurosciences, University of Nottingham, City Hospital campus, Hucknall Road, Nottingham NG5 1PB UK

Tel: +44 115 823 1765

Fax: +44 115 823 1767

E-mail: [philip.bath@nottingham.ac.uk](mailto:philip.bath@nottingham.ac.uk)

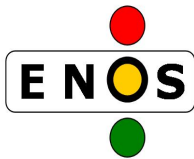

**CONFIDENTIAL: ENOS SAP APPENDIX 20130811**  
**CONTENTS**

**Appendix A Statistical Analysis Plan**

- 1 Introduction
- 2 Primary research questions
- 3 Trial design
  - 3.1 Design
  - 3.2 Trial population
  - 3.3 Randomisation
    - 3.3.1 Stratification
    - 3.3.2 Minimisation
    - 3.3.3 Simple randomisation
  - 3.4 Minimising bias
  - 3.5 Ethics and regulatory approvals
- 4 Statistical analysis plan (SAP)
  - 4.1 Original SAP
  - 4.2 Revised SAP
  - 4.3 Outcomes and their analysis
    - 4.3.1 Analysis populations
      - 4.3.1.1 Intention-to-treat safety population
      - 4.3.1.2 Intention-to-treat efficacy population
      - 4.3.1.3 Per protocol population
      - 4.3.1.4 Analyses by population
    - 4.3.2 Missing data, and death
    - 4.3.3 Statistical assumptions
      - 4.3.3.1 Proportionality of odds
      - 4.3.3.2 Alpha spending
      - 4.3.3.3 mRS levels
  - 4.4 Primary outcome
    - 4.4.1 Primary outcome measure
    - 4.4.2 Primary outcome analysis
    - 4.4.3 Primary outcome subgroup analyses
      - 4.4.3.1 Primary publications
      - 4.4.3.2 Secondary publications
    - 4.4.4 Sensitivity analyses
  - 4.5 Secondary outcomes
    - 4.5.1 Events by day 7 (end of treatment)
    - 4.5.2 Hospital events
    - 4.5.3 Outcomes at day 90 (end of follow-up)
  - 4.6 Safety analyses – Serious Adverse Events
    - 4.6.1 SAEs by day 10
    - 4.6.2 SAEs by day 90
  - 4.7 Compliance
  - 4.8 Analysis methods
    - 4.8.1 Clinical variables
    - 4.8.2 Imaging variables
    - 4.8.3 Procedures

**Appendix B Definitions**

- 1 Definitions of events/outcomes
  - 1.1 Deep vein thrombosis (DVT), symptomatic, by/at day 7
  - 1.2 Disposition
  - 1.3 Extracranial haemorrhage, major

## **CONFIDENTIAL: ENOS SAP APPENDIX 20130811**

- 1.4 Feeding status
- 1.5 Headache, requiring treatment by day 7
- 1.6 Hypertension, symptomatic by day 7
- 1.7 Hypotension, symptomatic by day 7
- 1.8 Neurological deterioration, by day 7
- 1.9 Neurological deterioration, clinical by day 7
- 1.10 Pulmonary embolism, symptomatic by day 7
- 1.11 Recurrent stroke, symptomatic by day 7
- 1.12 Intracranial haemorrhage, symptomatic by day 7
- 1.13 Time at home
- 1.14 Venous thromboembolism, symptomatic by day 7
- 2 Other definitions and notes
  - 2.1 Geographical region
  - 2.2 Haemodynamic variables, calculated
  - 2.3 Acute Stroke Unit
  - 2.4 Stroke Rehabilitation Unit
  - 2.5 Final diagnosis
  - 2.6 Date of death
  - 2.7 EQ-5D and Health Utility Status
  - 2.8 Protocol violations
    - 2.8.1 All analyses
    - 2.8.2 GTN vs no GTN
    - 2.8.3 Continue vs stop pre-stroke antihypertensive medication
  - 2.9 CT/MR image adjudication
    - 2.9.1 Infarct visibility
    - 2.9.2 Lesion site
    - 2.9.3 Sub-territory sites

## **Appendix C Tables and figures in primary publications**

### Authors

- 1 Table 1. Baseline characteristics
  - 1.1 Both GTN/no GTN and Continue/Stop
  - 1.2 Continue vs stop pre-stroke antihypertensive medications
- 2 Table 2. Compliance
  - 2.1 Both GTN/no GTN and Continue/Stop
- 3 Table 3. Outcomes
  - 3.1 Both GTN/no GTN and Continue/Stop
- 4 Table 4. Serious adverse events
  - 4.1 Both GTN/no GTN and Continue/Stop
  - 4.2 Continue vs stop pre-stroke antihypertensive medications
- 5. Table 5. Protocol violations
  - 6.1 Both GTN/no GTN and Continue/Stop
- 6. Table A. Blood pressure
  - 5.1 Both GTN/no GTN and Continue/Stop
- 7. Table B. mRS by treatment assignment
  - 7.1 Both GTN/no GTN and Continue/Stop
- 8. Table C. Outcome by sub-groups
  - 8.1 Both GTN/no GTN and Continue/Stop
- 9 Figure 1. Trial flow diagram
  - 9.1 Both GTN/no GTN and Continue/Stop
- 10 Figure 2. Blood pressure profile
  - 10.1 Both GTN/no GTN and Continue/Stop
- 11 Figure 3. Modified Rankin Scale distribution
  - 11.1 Both GTN/no GTN and Continue/Stop

## **CONFIDENTIAL: ENOS SAP APPENDIX 20130811**

12 Figure 4. Primary outcome in pre-specified subgroups

12.1 Both GTN/no GTN and Continue/Stop

13 Figure 5. Survival curve

13.1 Both GTN/no GTN and Continue/Stop

14 Figure 6. Meta-analysis of relevant trials

14.1 GTN/no GTN

14.2 Continue/Stop

### **Appendix D Secondary publications**

1 Published

2 Submitted

3 In preparation

4 Planned

4.1 Treatment-related

4.2 'Epidemiological'

4.3 Systematic reviews/meta-analyses

### **Appendix E. Planned secondary publication: Baseline data**

### **Appendix F. Planned secondary publication: Interventions in acute ischaemic stroke**

### **Appendix G. Planned secondary publication: Interventions in acute spontaneous intracerebral haemorrhage**

### **Appendix H. Planned secondary publication: Haemodynamic effects of GTN versus no GTN, and continue versus stop pre-stroke antihypertensive medications**

### **Appendix I. Planned secondary publication: GTN, headache and outcome**

### **Appendix J. Planned secondary publication: Effect of feeding status/dysphagia**

### **Appendix K. Planned secondary publication: Comparison of spontaneous intracerebral haemorrhage between world regions**

### **Appendix L. Comparison of patients who took versus did not take pre-stroke antihypertensive medications: baseline characteristics and outcomes.**

### **Appendix M. Planned secondary publication: Temporal effects of GTN on functional outcome – a, individual patient data meta-analysis of GTN trials**

### **Appendix N. Planned secondary publication: Continuing versus stopping pre-stroke antihypertensive medications – an individual patient data meta-analysis of trials**

## **REFERENCES**

## **KEYWORDS**

**CONFIDENTIAL: ENOS SAP APPENDIX 20130811**

acute stroke, antihypertensive drug, blood pressure, glyceryl trinitrate, randomised controlled trial, statistical analysis plan

## **1 INTRODUCTION**

High blood pressure (BP) is present in 70% or more of patients with acute ischaemic stroke and spontaneous intracerebral haemorrhage (ICH).<sup>1</sup> Affected patients have a worse outcome, whether judged as early recurrence, death within a few weeks, or combined death and dependency after several months.<sup>1-4</sup> Lowering BP might therefore reduce these events and improve functional outcome providing that cerebral perfusion is not reduced in the presence of dysfunctional cerebral autoregulation. However, recent large trials have been inconclusive in their results.<sup>5,6</sup>

Nitric oxide (NO) donors are candidate treatments for acute stroke; NO is a cerebral and systemic vasodilator, modulates vascular and neuronal function, and inhibits apoptosis.<sup>7</sup> Preclinical studies of cerebral ischaemia have found that NO donors reduce stroke lesion size, and improve regional cerebral blood flow and functional outcome.<sup>8</sup> Five small clinical studies of NO donors have been performed, these involving a total of 208 patients with recent stroke. Intravenous sodium nitroprusside reduced BP without altering CBF, and exhibited antiplatelet effects (thereby precluding its use in spontaneous ICH).<sup>9</sup> Four pilot trials of transdermal glyceryl trinitrate (GTN) found that it lowered BP by approximately 8%; did not alter platelet function (and so could be given in ICH); did not alter middle cerebral artery blood flow velocity or regional cerebral blood flow; improved aortic vascular compliance; and could be given to patients with dysphagia.<sup>10-13</sup> No safety concerns were present in these studies, and in one small trial ultra-acute treatment with GTN was associated with an improved functional outcome.<sup>13,14</sup>

On the basis of this pre-clinical and clinical data showing feasibility, tolerability and apparent safety of GTN, and the potential for efficacy, the large 'Efficacy of Nitric Oxide in Stroke' (ENOS) trial was started and is ongoing. ENOS is assessing, in a partial factorial prospective randomised open blinded-outcome design, whether to lower BP with GTN (versus no GTN), and whether to continue (versus stop) pre-stroke antihypertensive therapy. The trial commenced in 2001 and its protocol was published in 2006.<sup>15</sup> Several non treatment-related and blinded analyses of the ENOS database have been published since the start of the trial.<sup>16-20</sup> The independent Data Monitoring Committee have assessed the trial every 6 months and on each occasion recommended that the trial should continue.

## **2 PRIMARY RESEARCH QUESTIONS**

1. Does transdermal glyceryl trinitrate (GTN, 5 mg daily for 7 days), when given acutely after stroke, reduce death or dependency at 90 days, as compared to no GTN. This question applies to all randomised patients.
2. Does continuing pre-stroke antihypertensive medications reduce death or dependency at 90 days, as compared to stopping these medications for 7 days. This question applies to those randomised patients who were taking antihypertensive medications immediately prior to stroke onset (anticipated to be ~50% of the whole trial population).

## **3 TRIAL DESIGN**

### **3.1 Design**

## **CONFIDENTIAL: ENOS SAP APPENDIX 20130811**

ENOS is an international multicentre prospective randomised single-blind blinded-endpoint controlled partial-factorial trial with centralised randomisation (stratification and minimisation) to ensure allocation concealment and reduce bias.

### **3.2 Trial population**

Previously independent adult patients who are conscious, have residual limb weakness, have systolic blood pressure between 140-220 mmHg, and are within 48 hours of stroke onset, are eligible for enrolment. The full inclusion-exclusion criteria are given in the protocol.<sup>15</sup>

### **3.3 Randomisation**

All patients are randomised to GTN vs no GTN. Those patients who are taking antihypertensive medications immediately prior to their stroke are also randomised to continue or stop this. As a result, there are 6 treatment groups, with a working sample size totalling 3,800 patients (which exceeds the grant-funded 3,500 patients), and approximately 50% of patients on BP drugs before their stroke.

|                | Pre-stroke | BP drugs | No pre-stroke<br>BP drugs | Size by row |
|----------------|------------|----------|---------------------------|-------------|
|                | Continue   | Stop     |                           |             |
| GTN            | 475        | 475      | 950                       | 1,900       |
| No GTN         | 475        | 475      | 950                       | 1,900       |
| Size by column | 950        | 950      | 1,900                     | 3,800       |

The process of randomisation includes (1) stratification; (2) minimisation; and then (3) simple randomisation. Stratification and minimisation allow for improved matching at baseline, stratification allows variable categories to be treated as trials in their own right, minimisation increases statistical power,<sup>21</sup> and simple randomisation reduces predictability. The minimisation variables will be used for adjustment of the primary and secondary analyses.

#### **3.3.1 Stratification**

- i. Immediate prior use of antihypertensive treatment.
- ii. Stroke pathological type (ischaemic stroke [IS]/unknown, spontaneous intracerebral haemorrhage [ICH])
- iii. Country

#### **3.3.2 Minimisation**

- i. Age ( $\leq 70$  years,  $> 70$  years)
- ii. Sex (female, male)
- iii. History of hypertension (no, yes)
- iv. History of previous stroke (no, yes)
- v. Diabetes mellitus (no, yes)
- vi. Current use of nitrate therapy (no, yes)
- vii. Stroke severity (Scandinavian Stroke Scale,<sup>22</sup> SSS  $> 30$ ,  $\leq 30$ )
- viii. Total anterior circulation syndrome (no, yes)<sup>23</sup>
- ix. Systolic BP ( $\leq 160$ ,  $> 160$  mmHg)
- x. Treated with rt-PA prior to randomisation (yes, no)
- xi. Feeding status (other, iv fluids/nothing)
- xii. Time to randomisation ( $\geq 24$  hours,  $< 24$  hours)

#### **3.3.3 Simple randomisation**

On 5% of patients at time of minimisation.

### **3.4 Minimising bias**

Multiple measures are taken to minimise bias: central data registration with real-time on-line validation; concealment of allocation; patient blinding to GTN (gauze dressing over GTN patch or equivalent area of skin); blinded central telephone assessment of 3 month outcome by staff at National Coordinating Centres; assessment of patient recall of treatment;<sup>11</sup> blinded adjudication of CT scans/SAEs; exclusion of patients enrolled in other trials; analysis by intention-to-treat; and adjustment for minimisation factors and non-randomised treatment (alteplase).

### **3.5 Ethics and regulatory approvals**

ENOS is run according to the principles of the Declaration of Helsinki and 'Good Clinical Practice'. The trial was approved by national competent authorities (where applicable), e.g. European Medicines Agency (EudraCT number 2004-003870-27, date 1/10/2004), UK Medicines & Healthcare products Regulatory Authority (formerly Medicines Control Agency, reference MF8000/10820, date 16/2/2001); national and local research ethics committees (REC), e.g. UK Trent REC (reference MREC/01/4/046, date 3/9/2001), Scottish 1 REC (reference MREC/02/0/121, date 7/1/2003); and adopted by the Australian, Canadian, and UK NIHR Stroke Research Networks (date 25/4/2006). Trial funding from BUPA Foundation, and the Medical Research Council (grant: G0501797, awarded 26/4/2006) followed external peer review.

## **4 STATISTICAL ANALYSIS PLAN (SAP)**

### **4.1 Original SAP**

The trial was originally designed to recruit 5,000 patients so as to detect an absolute risk reduction in the binary outcome of death or dependence (modified Rankin Scale, mRS>2) of 5% from 50% in the control group to 45% in the GTN group, with power 90%, significance 5%, and allowance for losses to follow-up. The original planned method of analysis, as published in the protocol paper,<sup>15</sup> was to compare the proportion of participants who were dead or dependent at 90 days between the treatment groups.

### **4.2 Revised SAP**

Recent research has shown that binary analysis of the 7-level mRS is sub-optimal and that statistical power is increased by using all the data at each level by comparing differences in distribution across the whole scale between the treatment groups.<sup>24</sup> This approach is now recommended by the European Stroke Organisation.<sup>25</sup> A further, and additional, increase in statistical power is achieved by incorporating key prognostic baseline variables as covariates.<sup>26</sup> Other groups have presented similar findings and used this approach.<sup>27-29</sup>

Hence, the primary analysis of the mRS in ENOS will utilise the shift approach, as analysed using ordinal logistic regression, with adjustment for covariates, with comparison between treatment groups (GTN/no GTN; continue/stop pre-stroke BP medications). The overall proposal to change the method of analysis of the primary outcome from binary to ordinal was first presented to, and agreed by, the Trial Steering Committee in January 2008, and confirmed in 2009. An early draft version of this SAP, highlighting this change, was posted on the trial website in April 2009.

This change to the design of ENOS was made without knowledge of any interim analysis that split patients by treatment group. The statistician who prepares analyses for the independent Data Monitoring Committee (DMC), and the DMC themselves, were not



## **CONFIDENTIAL: ENOS SAP APPENDIX 20130811**

involved in the writing of this statistical analysis plan (SAP), and have not seen or commented on it.

### **4.3 Outcomes and their analysis**

All outcomes will be assessed by:

- GTN versus no GTN
- Continue versus temporarily stop pre-stroke antihypertensive medication

#### **4.3.1 Analysis populations**

The following populations of patients are defined for analyses and take account that the trial is single-blind in design.

##### **4.3.1.1 Intention-to-treat safety population**

All randomised participants with vital status recorded.

##### **4.3.1.2 Intention-to-treat efficacy population**

All randomised participants with the primary outcome recorded.

##### **4.3.1.3 Per protocol population**

All randomised participants with the primary outcome recorded and who did not have a relevant protocol violation as defined in **Appendix B.2.8**. A key criterion is that an included patient must have received at least 4 days of treatment (or died before this).

##### **4.3.1.4 Analyses by population**

All efficacy analyses will be performed on the intention to treat population. A separate 'per protocol' analysis will be performed on the primary and key secondary outcomes. Safety analyses will be performed on the safety population.

#### **4.3.2 Missing data, and death**

Missing data will not be imputed. Participants who die will be assigned discrete values for outcome measures with a value worse than any living value (as is standard for mRS, BI). This avoids giving death the same value as the worst possible outcome when alive (best to worst), and ensures that patients who die are included in all analyses. The EQ-5D Health Utility State (HUS) gives death a score of 0.

- Modified Rankin Scale (mRS), 0 to 5 with death = 6
- Barthel Index (BI), 100 to 0 with death = -5
- Scandinavian Stroke Scale (SSS), 58 to 0 with death = -1
- EQ-5D HUS, 1 to -0.594 with death = 0
- EQ-VAS (visual analogue scale), 100 to 0 with death = -1
- Zung Depression Scale (ZDS), 25 to 100 with death = 102.5
- Telephone Interview for Cognitive Status (TICS), 39 to 0 with death = -1
- Verbal fluency (animal naming),  $\infty$  to 0, with death = -1
- Telephone Mini Mental Status Exam (t-MMSE), 18 to 0, with death = -1

Patients who are still in hospital at day 90 will have a length of stay assigned at 110 days. Similarly, death will be censored at day 110.

#### **4.3.3 Statistical assumptions**

##### **4.3.3.1 Proportionality of odds**

The treatment effects on ordered categorical data will be compared using ordinal logistic regression (OLR) with adjustment for the prognostic covariates as listed in 3.3.2, plus use of alteplase. OLR assumes proportionality of odds and this will be tested using a

## **CONFIDENTIAL: ENOS SAP APPENDIX 20130811**

likelihood ratio test. If the proportional odds assumption is not met, OLR will still be used and the lack of proportionality of odds highlighted. In this circumstance, the odds ratio may remain relevant (and probability value accurate) providing the treatment effect is relatively consistent across the spread of mRS scores.

### **4.3.3.2 Alpha spending**

The Data Monitoring Committee performs safety assessments using the '3 standard deviation' approach; hence, no significant spending of alpha has occurred during the trial. All analyses will be two-tailed and a p-value of <0.05 will denote statistical significance; 95% confidence intervals will be provided. Adjustment for multiple comparisons will not be performed but all contrasts will be declared.

The primary and secondary outcomes follow here. Although not all the secondary outcomes will be presented in the two primary papers (GTN vs no GTN, continue vs stop pre-stroke antihypertensive medication), they will be used in secondary papers and are given here for completeness.

### **4.3.3.3 mRS levels**

Although some previous studies (e.g. SAINT-I/II, ECASS-3<sup>29-31</sup>) combined death with severe disability (i.e. mRS categories 5 and 6 were combined), these mRS categories will be analysed separately in ENOS since blood pressure treatment may influence both mortality and disability.

## **4.4 Primary outcome**

### **4.4.1 Primary outcome measure**

The seven-level ordered categorical modified Rankin Scale (mRS):<sup>22,32</sup>

- 0 No symptoms at all.
- 1 No significant disability, despite symptoms; able to carry out all usual duties and activities.
- 2 Slight disability; unable to carry out all previous activities but able to look after own affairs without assistance.
- 3 Moderate disability; requiring some help, but able to walk without assistance.
- 4 Moderately severe disability; unable to walk without assistance and unable to attend to own bodily needs without assistance.
- 5 Severe disability; bedridden, incontinent and requiring constant nursing care and attention.
- 6 Dead.

### **4.4.2 Primary outcome analysis**

All 7 levels of the mRS will be used with analysis by OLR with adjustment for baseline covariates:<sup>24-26</sup>

- Age; sex (female, male); pre-morbid mRS; history of previous stroke (no, yes); diabetes mellitus (no, yes); current use of nitrate therapy (no, yes); stroke severity (Scandinavian Stroke Scale, SSS); total anterior circulation syndrome (no, yes); stroke pathological type (non, IS, ICH); systolic BP (SBP); treated with rt-PA (yes, no); feeding status (oral, non oral); time onset to randomisation.
- The comparison of GTN vs no GTN will also include the covariate for Continue vs stop pre-stroke antihypertensive medication.
- The comparison of Continue vs stop pre-stroke antihypertensive medication will also include the covariate for GTN vs no GTN.

Covariate adjustment with ordered categorical (mRS) or continuous (age, SSS, SBP, time) variables will use the original, not dichotomised, data.

### **4.4.3 Primary outcome subgroup analyses**

## **CONFIDENTIAL: ENOS SAP APPENDIX 20130811**

The effect of the two interventions (GTN versus no GTN; continue versus temporarily stop pre-stroke antihypertensive medication) on the primary outcome will be performed within the following pre-specified subgroups of participants. Subgroup analyses will be performed on mRS using ordinal logistic regression. An interaction test between each subgroup and treatment will be performed.

### **4.4.3.1 Primary publications**

- a) Age -  $\leq 70$ ,  $> 70$  years
- b) Sex - female, male
- c) History of prior stroke - no, yes
- d) Stroke severity (/58) - SSS  $> 40$ , 30-40,  $< 30$
- e) Oxfordshire Community Stroke Project Classification<sup>23</sup> - LACS, POCS, PACS TACS
- f) Stroke pathological type - ischaemic stroke, unknown, ICH
- g) Mean blood pressure (mmHg) - SBP  $\leq 160$ , 161-180, 181-200,  $> 200$
- h) Atrial fibrillation/flutter - absent, present
- i) Non-oral feeding (surrogate for dysphagia) - absent, present
- j) Carotid stenosis (ipsilateral %) - 0-49, 50-69, 70-99, 100 (as determined locally)
- k) Time to randomisation (hours) -  $\leq 6.0$ , 6.1-12.0, 12.1-24.0, 24.1-36,  $> 36$
- l) Treatment with alteplase - present, absent

Additionally, for GTN versus no GTN

- a) History of recent nitrate exposure - no, yes
- b) Pre-stroke antihypertensive medication randomisation - not relevant, continue, stop

Additionally, for continue versus stop pre-stroke antihypertensive medication:

- a) Pre-stroke antihypertensive class - angiotensin-converting enzyme inhibitor, angiotensin-II receptor antagonist, renin inhibitor,  $\beta$ -blocker, calcium-channel blocker, diuretic,  $\alpha$ -blocker, centrally acting agent, other (participants may appear in more than one subgroup)
- b) Number of classes of antihypertensive drugs pre-stroke - 1, 2, 3, 4, 5,  $> 5$
- c) GTN randomisation - GTN, no GTN

### **4.4.3.2 Secondary publications**

In secondary papers, the effect of treatment on mRS will also be assessed in additional sub-groups:

- a) Geographical region (section B.2.1)
- b) TOAST criteria (small vessel, large vessel, cardioembolism, dual pathology, other)
- c) Carotid stenosis ( $\geq 50\%$ ) - none, contralateral, ipsilateral, bilateral
- d) Old lesion on baseline neuroimaging - no, yes
- e) Lesion size - 1, 2, 3, 4 (Appendix B, section 2.9.2)
- f) Mass effect - 0,1 vs 2-4 vs 5,6 (Appendix B, section 2.9.3)

### **4.4.4 Sensitivity analyses**

Several sensitivity analyses will be performed as a reference for the primary analysis. The method of analysis is given: BLR: binary logistic regression; OLR: ordinal logistic regression

- |                                                            |                            |
|------------------------------------------------------------|----------------------------|
| a) mRS, unadjusted                                         | OLR                        |
| b) mRS, with additional adjustment for Geographical region | OLR                        |
| c) Dead or dependent (mRS 3-6, adjusted)                   | BLR                        |
| d) Dead or dependent (mRS 3-6, unadjusted)                 | BLR                        |
| e) Global outcome, mRS $> 1$ and BI $< 95$ , adjusted      | Wald test <sup>33,34</sup> |

Comparison (d) is the original trial primary outcome prior to switching to an ordinal analysis.

## **4.5 Secondary outcomes**

Secondary outcomes are listed by their timing. Analysis methods will include: MLR: multiple linear regression; analyses will be adjusted as in section 4.4.2 and also performed unadjusted for completeness.

### **4.5.1 Events by day 7 (end of treatment)**

|                                                     |     |
|-----------------------------------------------------|-----|
| a) Death                                            | BLR |
| b) Symptomatic intracranial haemorrhage             | BLR |
| c) Major extracranial haemorrhage                   | BLR |
| d) Symptomatic recurrent stroke                     | BLR |
| e) Impairment (SSS)                                 | MLR |
| f) Impairment (calculated NIHSS <sup>35</sup> )     | MLR |
| g) Clinical neurological deterioration              | BLR |
| h) Neurological deterioration <sup>22</sup>         | BLR |
| i) Headache that required treatment                 | BLR |
| j) Symptomatic hypotension that required treatment  | BLR |
| k) Symptomatic hypertension that required treatment | BLR |
| l) Symptomatic venous thromboembolism               | BLR |

### **4.5.2 Hospital events (collected at discharge or on death)**

|                                                   |     |
|---------------------------------------------------|-----|
| a) Length of stay in hospital                     | MLR |
| b) Discharge disposition (death/institution/home) | OLR |

### **4.5.3 Outcome at 90 days (end of follow-up)**

This are determined centrally by a telephone call between the patient (or carer) and an assessor blinded to treatment and earlier clinical information:

|                                                         |                        |
|---------------------------------------------------------|------------------------|
| a) Death (censored by day 110)                          | BLR                    |
| b) Time to death (censored at 110 days)<br>Meier curve) | Cox regression (Kaplan |
| c) Barthel Index (BI)                                   | MLR                    |
| d) Dead or disabled (BI <60)                            | BLR                    |
| e) Quality of life (HUS derived from EQ-5D)             | MLR                    |
| f) Quality of life (EQ-5D VAS)                          | MLR                    |
| g) t-MMSE                                               | MLR                    |
| h) TICS-M                                               | MLR                    |
| i) Verbal fluency                                       | MLR                    |
| j) Zung Depression Scale (ZDS, mood)                    | MLR                    |

## **4.6 Safety analyses – Serious Adverse Events**

Safety analyses are listed together with their preferred method of analysis. All SAEs reported by the investigator are adjudicated by a member of the independent adjudicator panel who is blinded to treatment. The adjudicated SAE categorisation will be presented for all analyses. The number of participants with a SAE rather than the number of SAE will be analysed. Comparisons will be performed on all patients.

### **4.6.1 SAEs by day 10 (7 days of treatment + 3 days of washout)**

|                                              |     |
|----------------------------------------------|-----|
| a) Serious adverse event, number of patients | BLR |
|----------------------------------------------|-----|

### **4.6.2 SAEs by day 90 (end of follow-up)**

|                                              |     |
|----------------------------------------------|-----|
| a) Serious adverse event, number of patients | BLR |
|----------------------------------------------|-----|

Serious adverse events by 90 days will be tabulated as the number of participants with an event in each treatment group, and the number of events in each treatment group,

**CONFIDENTIAL: ENOS SAP APPENDIX 20130811**

by the following subgroups. BLR will be used to identify any differences between treatment groups.

- a) System organ class
- b) Event category within system organ class
- c) Time of onset relative to treatment (before, during, after)
- d) Median time to event by event category
- e) Severity (mild, moderate, severe)
- f) Relationship to study drug (definitely not, unlikely, possibly, probably, definitely)
- g) Fatal, non-fatal
- h) Fatal by event category

Common serious adverse events that will be reported are listed in Appendix C table 4.

**4.7 Compliance**

Compliance with allocated treatment will be tabulated. Patients receiving at least the first 4 doses of treatment are considered to have received full treatment. The following data will be presented separately for GTN vs. no GTN, and continue vs. temporarily stop pre-stroke antihypertensive medications

- a) Number (%) of participants who received all 7 days of allocated treatment
- b) Number (%) of participants who received at least the first 4 days of allocated treatment
- c) Number (%) of participants who received at least the first allocated treatment
- d) Number (%) of participants who did not receive any of the allocated treatment

In those participants who did not receive all the first 4 days of allocated treatment, the reason for non-compliance will be given:

- a) Discharged before day 4
- b) Physician withdrew participant
- c) Adverse event, unacceptable
  - a. Headache
- d) Serious adverse event
- e) Consent withdrawn by participant or relative
- f) Death
- g) Other reason

| Reasons for non-compliance                    | All | GTN      | No GTN |
|-----------------------------------------------|-----|----------|--------|
| Reasons for non-compliance                    | All | Continue | Stop   |
| Participants randomised                       |     |          |        |
| Compliance                                    |     |          |        |
| Received all 7 days of treatment              |     |          |        |
| Received first 4 days of treatment            |     |          |        |
| Received first treatment                      |     |          |        |
| Did not receive any randomised treatment      |     |          |        |
| Non-compliance by day 4 (%)                   |     |          |        |
| Discharged                                    |     |          |        |
| Physician withdrew participant                |     |          |        |
| Adverse event, unacceptable                   |     |          |        |
| Headache                                      |     |          |        |
| Serious adverse event                         |     |          |        |
| Consent withdrawal by participant or relative |     |          |        |
| Death                                         |     |          |        |
| Other                                         |     |          |        |

Note: Patients discharged before day 7 were given their remaining part of their course of GTN to complete at home.

## **4.8 Analysis methods**

Data variables will, in the main, be analysed using binary logistic regression (BLR), Cox logistic regression (CLR); ordinal logistic regression (OLR) or multiple logistic regression (MLR), thereby allowing adjustment for baseline measures and other covariates (as listed partially in section 4.4.3).

### **4.8.1 Clinical variables**

- BLR: Death; Death or deterioration (day 7); Recurrence (day 7); Symptomatic intracranial bleed (sICH); Discharged to or at Home
- CLR: Death
- OLR: Modified Rankin Scale (mRS) [/6];
- MLR: Scandinavian Stroke Scale (SSS, /58); Length of stay in hospital; Barthel Index (BI, /100); telephone Mini-Mental State Examination (tMMSE); Telephone Interview of Cognition Scale (TICS, /39); Animal naming (/∞); Zung Depression Scale (ZDS, /100); Health Utility State (HUS, /1); EuroQoL Visual Analogue Scale (EQ-VAS, /100)

### **4.8.2 Imaging variables**

- BLR: Loss of grey-white definition; Loss of basal ganglia outline; Hypodensity; Mass effect; ICH mean radial expansion > 1mm; Second lesion; Hyperdense artery
- OLR: Lesion site; Lesion size: MCA, lacunar, cerebellum or brainstem; Mass effect, degree [/6]; Haemorrhagic Transformation of Infarct; Hypoattenuation; Mass effect score (greatest of Uncal> shift> ventricular> sulcal); Middle Cerebral Artery 1/3 (if MCA, >1/3, <1/3, no lesion); ASPECTS score; ICH diameter, max – adjudicated; ICH shape [/5]; ICH density [/5]; IVH Graeb [/12];<sup>36</sup> IVH modified Graeb [/32];<sup>37</sup>
- MLR: Volume (ABC/2), absolute (ml); Volume (ABC/2), relative (%); Diameter, max (cm); Haematoma shape index; Haematoma mean density; Haematoma density index; IVH volume

### **4.8.3 Procedures**

The two primary papers will be analysed using two separate sets of statistical programmes, one written specifically for the purpose and the other based on the Data Monitoring Committee report. A further analysis of a sub-set of the main results will be performed using a third statistical programme. This will allow the results to be cross-checked.

To maximise recruitment, maximise time for analysis and interpretation of the results, and allow presentation of the final results at the European Stroke Conference in early May 2014, a soft-lock and preliminary analysis will be performed once the last patient has had their final outcome recorded in early January 2014. Following final data cleaning on the last patients to be recruited, a hard-lock will be performed in late January/early February and the results of this considered by the Trial Steering Committee in mid February 2014. The preliminary interpretation will be performed after soft-lock by PMB, NS, JW and SP; they will not be involved in resolving any final queries to maintain the integrity and blinding of the final database. The approach of soft-lock then hard-lock is a standard approach in large trials and does allow more time to be spent on considering the results of a trial, their interpretation and presentation for publication.

## **1 DEFINITIONS OF EVENTS/OUTCOMES**

### **1.1 Deep vein thrombosis (DVT), symptomatic, by/at day 7**

The clinical suspicion of DVT will need confirmation by either venography or ultrasound examination.

### **1.2 Disposition**

Disposition at 90 days and discharge disposition is categorised as death, institution or home.

- Institution refers to warden controlled, residential home, care home, nursing home, still an inpatient, or readmitted to hospital.
- Home refers to home alone, home with spouse/carer and carer's home.

### **1.3 Extracranial haemorrhage, major**

Clinically overt bleeding associated with one or more of:

- Transfusion of > 2 red cell units of blood
- A fall in haemoglobin of 20 g/l (=2 g/dl, = 1.24 mmol/l)
- Bleeding into retroperitoneum, intraocular space or major joint
- Bleeding leading to permanent cessation of trial interventions

### **1.4 Feeding status**

Feeding status will be defined as:

- Oral: normal diet, soft diet
- Non-oral: nasogastric tube fed, PEG-tube fed, iv/sc fluids, no feeding/fluids

### **1.5 Headache, requiring treatment by day 7**

A headache occurring during GTN/no GTN treatment that necessitates intervention, including withdrawing GTN/no GTN treatment.

### **1.6 Hypertension, symptomatic by day 7**

A rise in blood pressure necessitating intervention to reduce it.

### **1.7 Hypotension, symptomatic by day 7**

A symptomatic fall in blood pressure of > 20% as compared with baseline necessitating intervention with intravenous colloid or crystalloid (saline).

### **1.8 Neurological deterioration, by day 7**

A reduction in SSS of >4 points, or decrease in consciousness level by >2 points, as compared with baseline.<sup>22</sup>

### **1.9 Neurological deterioration, clinical by day 7**

Neurological deterioration determined clinically.

### **1.10 Pulmonary embolism (PE), symptomatic by day 7**

The clinical suspicion of PE will need confirmation by either high-probability ventilation-perfusion lung scintigraphy, pulmonary angiography, inconclusive V/Q scan and DVT, or lead to death.

### **1.11 Recurrent stroke, symptomatic, by/at day 7**

Classified as haemorrhagic or ischaemic (if documented by CT/MR scan or autopsy), or of unknown type. The time from stroke onset and side will be noted. (This definition deliberately does not attempt to differentiate true recurrence from extension of the presenting lesion since this is clinically and radiologically difficult unless recurrence

occurs in a new arterial territory.)

**1.12 Intracranial haemorrhage, symptomatic by day 7**

Neurological deterioration or death, associated with intracranial haemorrhage found on CT/MR scan or autopsy.

**1.13 Time at home**

Calculated as time from date of discharge to day 90 or death if earlier; those who die in hospital or are discharged to a non-home setting are given a score of zero. Readmission to hospital is not counted in this time.

**1.14 Venous thromboembolism, symptomatic by day 7**

Symptomatic DVT and/or symptomatic pulmonary embolism

**2 OTHER DEFINITIONS AND NOTES**

**2.1 Geographic region**

This is categorised into Africa, America north, Asia east, Asia south, Asia south-east, Australasia, British Isles, and Europe. Each geographical region is defined as the following countries, each of which have randomised at least one participant into the ENOS trial:

- a) Africa: Egypt
- b) America, north: Canada
- c) Asia, east: China, Hong Kong
- d) Asia, south: India, Sri Lanka
- e) Asia, south-east: Malaysia, Philippines, Singapore
- f) Australasia: Australia, New Zealand
- g) British Isles: Eire, UK
- h) Europe: Denmark, Georgia, Greece, Italy, Norway, Poland, Romania, Spain, Sweden

**2.2 Haemodynamic variables, calculated**

These are calculated from SBP, diastolic blood pressure (DBP) and HR measurements at baseline (day 0) and on days 1-6. Mean, peak, and standard deviation (SD), of SBP/DBP/HR are calculated from available measurements at that time point.

Coefficient of Variation,  $CV=SD/mean$ .

- a) SBP, mean
- b) SBP, peak
- c) SBP, intra-visit variability = SD of SBP separately at each time point
- d) SBP, CV
- e) DBP, mean
- f) DBP, peak
- g) DBP, intra-visit variability = SD of DBP separately at each time point
- h) DBP, CV
- i) HR, mean
- j) HR, peak
- k) HR, intra-visit variability = SD of HR separately at each time point
- l) HR, CV
- m) Mean arterial pressure (MAP) =  $mean\ DBP + (mean\ SBP / 3)$
- n) Mean pressure (MP) =  $(mean\ DBP + mean\ SBP) / 2$
- o) Pulse pressure (PP) =  $mean\ SBP - mean\ DBP$
- p) Pulse pressure index (PPI) =  $PP / MAP$



## **CONFIDENTIAL: ENOS SAP APPENDIX 20130811**

- q) Rate-pressure product (RPP) = mean SBP x mean HR
- r) Mean SBP across days 1-4
- s) Inter-visit Variability (SBP-inter SD) = SD of SBP across days 1-4
- t) CV SBP across days 1-4
- u) SBP peak across days 1-4

### **2.3 Acute Stroke Unit (ASU)**

A high-dependency nursing unit (or area) caring only/mainly for patients with acute stroke and providing close monitoring of neurological and vascular signs.

### **2.4 Stroke Rehabilitation Unit (SRU)**

A dedicated rehabilitation unit (or area) caring only/mainly for patients with recent stroke and providing multi-disciplinary therapy (e.g. physiotherapy, occupational therapy, speech & language therapy).

### **2.5 Final diagnosis: ischaemic stroke, ICH, unknown type of stroke, non-stroke**

The final diagnosis for the qualifying event will be determined using information from the recruiting site based on the clinical presentation, history of recovery and interpretation of the brain scan. The resulting diagnosis will be compared with that from central adjudication of the baseline brain scan. If there is a discrepancy between site and adjudication, the site will be contacted to clarify the diagnosis and the scan reviewed centrally by JMW; ultimately the site's final diagnosis will be used if agreement cannot be obtained.

Final diagnosis will comprise one of the following: ischaemic stroke (which includes a normal CT brain scan), ICH, stroke of unknown pathological type, or non-stroke (e.g. tumour, abscess, subdural bleed).

Final diagnosis will be determined using the following source(s):

1. Hospital event form (completed at discharge or death: final diagnosis question). If this is unavailable use 2.
2. Day 7 form (baseline CT/MRI scan result question). If this is unavailable use 3.
3. Baseline form – as used for randomisation (baseline CT/MRI scan result question). If this is unavailable use 4.
4. If the diagnosis of stroke is not known according to the data sources above (e.g. due to early death and no autopsy), then the diagnosis will be assigned as 'Stroke, type unknown'.

### **2.6 Date of death**

Dates of death have multiple sources and these are ranked for determining the date (in case a particular source is missing the information):

1. MRIS/ONS feedback, if UK patient
2. Serious adverse event form
3. Hospital event form
4. Day 7 form

If there is a discrepancy in the recorded date then the site are approached to confirm the correct date.

### **2.7 EQ-5D and Health Utility States (HUS)**

EQ-5D is a measure of health status and is composed of the EQ-5D descriptive system and EQ visual analogue scale (EQ VAS). The EQ VAS is a self-rated scale from 0 (worst imaginable health state) to 100 (best imaginable health state). The EQ-5D descriptive system has 5 dimensions: mobility, self-care, usual activities, pain/discomfort and anxiety/depression. Each dimension has 3 levels; no problems (level 1), some problems (level 2), severe problems (level 3).<sup>38</sup>

## CONFIDENTIAL: ENOS SAP APPENDIX 20130811

There are 243 possible health states. Each health state is referred to by a 5 digit code, e.g., 11111. The EQ-5D health states can be converted into a single summary index ranging from 1.00, i.e. full health (11111), to -0.594 (33333, worst possible state using the UK version of the time trade-off algorithm), with death assigned to 0.<sup>38</sup> The conversion is made by applying the formula in Table 5, which deducts weights applied to each dimension from the starting value of 1. The UK version of the EQ-5D index algorithm using the time trade off value set will be used for all patients.<sup>19</sup>

EQ-5D index scoring algorithm (Time trade-off: UK version)

|                     | Weight |
|---------------------|--------|
| Full health (11111) | 1      |
| At least one 2 or 3 | -0.081 |
| At least one 3      | -0.269 |
| Mobility            |        |
| Score 2             | -0.069 |
| Score 3             | -0.314 |
| Self-care           |        |
| Score 2             | -0.104 |
| Score 3             | -0.214 |
| Usual activities    |        |
| Score 2             | -0.036 |
| Score 3             | -0.094 |
| Pain/discomfort     |        |
| Score 2             | -0.123 |
| Score 3             | -0.386 |
| Anxiety/depression  |        |
| Score 2             | -0.071 |
| Score 3             | -0.236 |

For example, a health state of 32211 will convert to 0.196 ( $=1-0.81-0.269-0.314-0.104-0.071$ ).

### 2.8 Protocol violations

For per protocol analyses, patients who have one or more of the following protocol violations will be excluded from the per protocol population:

#### 2.8.1 All analyses

- Failure to obtain consent or assent
- Antihypertensive medication received post-stroke and pre-randomisation
- Age < 18 years
- Randomised > 48 hours
- No limb weakness at any point in presentation
- Glasgow Coma Scale (GCS) < 8 at baseline
- Systolic BP < 140 mmHg or > 220 mmHg at baseline
- Final diagnosis non-stroke
- Final diagnosis unknown because no neuroimaging or autopsy

#### 2.8.2 GTN vs no GTN

- Failure to stop pre-stroke nitrates
- No GTN received for first 4 days if randomised to GTN
- GTN received in first 4 days if randomised to no GTN

#### 2.8.3 Continue vs stop pre-stroke antihypertensive medication

- Failure to identify pre-stroke antihypertensive medication

## CONFIDENTIAL: ENOS SAP APPENDIX 20130811

- Antihypertensives received during first 4 days if randomised to stop
- Antihypertensives not received during first 4 days if randomised to continue

### 2.9 CT/MR image adjudication

All patients should have a diagnostic CT or MRI scan, ideally before randomisation or at least within one week of randomisation. A second CT or MRI scan is performed at the end of treatment ( $7 \pm 2$  days, or earlier if clinically warranted) to allow the effect of treatment on stroke lesion development to be assessed; principal investigators can opt in or out of the second scan. Both baseline and second CT/MRI scans are assessed by an independent adjudicator blinded to treatment assignment. Lesion size is assessed by an independent assessor, i.e. not by the investigator.

#### 2.9.1 Infarct visibility (as per IST-3 scheme ©JMW 2012<sup>39</sup>)

Infarct size is coded (small=1 through to large=4) using adjudicated data for both baseline and, where done, day 7 CT/MR scans.

#### 2.9.2 Site

M† =MCA = any lesion in the MCA territory  
AS =Infarct of up to half of ACA territory  
AL =Infarct of more than half of ACA territory  
PS =Infarct of up to half of PCA territory  
PL =Infarct of more than half of PCA territory  
MAS=M+AS†  
MAL=M+AL†  
MPS=M+PS†  
MPL=M+PL†  
MAP=Infarct of whole MCA, ACA and PCA territories4  
L† =Lacunar  
B† =Borderzone  
C† =Cerebellum  
S† =Brainstem  
CS†=Cerebellum and brainstem

#### Condensed code

see 2.13.10.2 below  
1  
2  
1  
3  
3 if MCA 1 or 2; 4 if MCA 3 or 4  
3 if MCA 1 or 2; 4 if MCA 3 or 4  
3 if MCA 1 or 2; 4 if MCA 3 or 4  
3 if MCA 1 or 2; 4 if MCA 3 or 4  
1  
1  
see b below  
see b below  
3

† code sub-territory sites as in 2.13.10.2

#### 2.9.3 Sub-territory sites

MCA sub-territory codes

1=small cortical infarct 1  
2=basal ganglia infarct (>2x2x2cm) 2  
3=infarct of white matter lateral to lateral ventricle (>2x2x2cm) 2  
4=infarct of anterior half of peripheral MCA territory 2  
5=infarct of posterior half of peripheral MCA territory 3  
6=infarct of whole of peripheral MCA territory 3  
7=6+infarct of lateral part of basal ganglia 4  
8=infarct of whole of MCA territory 4

Lacunar/Borderzone sub-territory codes

all 1

9=lacune in internal capsule/lentiform  
10=lacune in internal border zone  
11=lacune in centrum semiovale  
12=lacune in thalamus  
13=lacune in brainstem, including pons (not shown)  
14=anterior (mainly) border zone  
15=posterior (mainly) border zone

## CONFIDENTIAL: ENOS SAP APPENDIX 20130811

|                                         |   |
|-----------------------------------------|---|
| Cerebellum sub-territory codes          |   |
| 16=small cortical (not shown)           | 1 |
| 17=<1/2 hemisphere (medium) (not shown) | 2 |
| 18=>1/2 hemisphere (not shown)          | 3 |

|                                               |   |
|-----------------------------------------------|---|
| Brainstem sub-territory codes                 |   |
| 19=small, i.e. <1/2 medulla (not shown)       | 1 |
| 20=extensive, i.e. pons + medulla (not shown) | 2 |

|                                                       |  |
|-------------------------------------------------------|--|
| Degree of mass effect codes                           |  |
| 0=no swelling                                         |  |
| 1=effacement of sulci overlying stroke                |  |
| 2=1+minor effacement of adjacent lateral ventricle    |  |
| 3=1+complete effacement of adjacent lateral ventricle |  |
| 4=1+effacement of lateral and third ventricle         |  |
| 5=4+shift of the midline away from side of ventricle  |  |
| 6=5+effacement of basal cisterns                      |  |

### 2.9.4 Infarcts

|                                             |                            |
|---------------------------------------------|----------------------------|
| Loss of grey/white matter cortex definition | yes/no                     |
| Loss of basal ganglia outline               | yes/no                     |
| Hypodensity present                         | yes/no                     |
| Mass effect                                 | yes/no, if yes each yes/no |
| • Succal effacement                         |                            |
| • Ventricular effacement                    |                            |
| • Midline shift                             |                            |
| • Uncal herniation                          |                            |
| 1/3 MCA territory                           | yes/no                     |
| ASPECT score, for each region               | yes/no                     |
| Second discrete lesion                      | yes/no                     |
| Hyperdense artery                           | yes/no, if yes then site   |

### 2.9.5 Haemorrhage

By presence, importance and size (<3, 3-5, 5-8, >8 cm):

- Petechial
- Haemorrhagic transformation of infarct
- Parenchymal haematoma (no infarct)
- Parenchymal haematoma (remote from infarct)
- Subdural haematoma
- Subarachnoid haemorrhage
- Extradural haemorrhage

### 2.9.6 Other features

Reduction in brain tissue volume: none, moderate severe:

**CONFIDENTIAL: ENOS SAP APPENDIX 20130811**

- Central
- Cortical

Periventricular lucencies: none, restricted to region adjoining ventricles, from ventricle to cortex

- Anterior white matter
- Posterior white matter

Old vascular lesions: each yes/no

- Cortical infarct(s)
- Striatocapsular infarct(s)
- Borderzone infarct(s)
- Lacunar infarct(s)
- Brainstem/cerebellar infarct(s)

Non-stroke lesions, each yes/no

- Cerebral tumour
- Encephalitis
- Cerebral abscess
- Other, e.g. contusion

**APPENDIX C. TABLES AND FIGURES IN PRIMARY PUBLICATIONS**

**Authors**

ENOS Trial Investigators

**Format**

The primary publications for the GTN vs no GTN, and continue vs stop pre-stroke antihypertensive medications will share the same format for tables and figures as highlighted below. Any additions to, or differences in, one or other publication are given separately.

**1 Table 1. Baseline characteristics**

**1.1 Both GTN/no GTN and Continue/Stop publications**

Table 1. Baseline characteristics of patients enrolled into the ENOS trial. Data are number (%), median [interquartile range] or mean (standard deviation).

|                                       | All patients | GTN      | No GTN |
|---------------------------------------|--------------|----------|--------|
|                                       | All patients | Continue | Stop   |
| Number of patients                    |              |          |        |
| Age (years) †                         |              |          |        |
| Sex, male (%) †                       |              |          |        |
| Geographical region ‡                 |              |          |        |
| Africa                                |              |          |        |
| America, north                        |              |          |        |
| Asia, east                            |              |          |        |
| Asia, south                           |              |          |        |
| Asia, south-east                      |              |          |        |
| Australasia                           |              |          |        |
| British Isles                         |              |          |        |
| Europe, mainland                      |              |          |        |
| Pre-stroke mRS [/6]                   |              |          |        |
| Medical history (%)                   |              |          |        |
| Treated hypertension ‡                |              |          |        |
| Atrial fibrillation, current/previous |              |          |        |
| Stroke                                |              |          |        |
| Ischaemic heart disease               |              |          |        |
| Peripheral arterial disease           |              |          |        |
| Smoking, current (%)                  |              |          |        |
| Qualifying event (%) †                |              |          |        |
| Ischaemic stroke                      |              |          |        |
| Spontaneous intracerebral haemorrhage |              |          |        |
| Stroke type unknown                   |              |          |        |
| Non-stroke                            |              |          |        |
| Side of lesion, right (%)             |              |          |        |
| Scandinavian Stroke Scale (/58) †     |              |          |        |
| NIHSS (/42), calculated <sup>40</sup> |              |          |        |
| Glasgow Coma Scale [/15]              |              |          |        |
| OCSF classification (%)               |              |          |        |
| Total anterior †                      |              |          |        |
| Partial anterior                      |              |          |        |
| Lacunar                               |              |          |        |
| Posterior                             |              |          |        |
| TOAST classification (%) Ω∫           |              |          |        |

## CONFIDENTIAL: ENOS SAP APPENDIX 20130811

Cardioembolic  
Large vessel  
Small vessel  
Mixed  
Other  
Haemodynamics  
Systolic blood pressure (mmHg) †  
Diastolic blood pressure (mmHg)  
Heart rate, mean (bpm)  
Oral feeding (%)  
Time onset to randomisation (hours) †  
Thrombolysis †

---

† Minimisation variable; ‡ Stratification variable; Ω Ischaemic patients only; Δ Protocol violation

bpm: beats per minute; NIHSS: National Institutes of Health Stroke Scale; mRS: modified Rankin Scale; OCSP: Oxford Community Stroke Project TOAST: Trial of ORG 10172 in Acute Stroke Treatment

### 1.2 Continue vs stop pre-stroke antihypertensive medications

The following variables will also be given in table 1 of this primary paper.

---

|                                         | All patients | Continue | Stop |
|-----------------------------------------|--------------|----------|------|
| Number of patients                      |              |          |      |
| ...                                     |              |          |      |
| Medications (%)                         |              |          |      |
| Blood pressure lowering                 |              |          |      |
| Angiotensin converting enzyme inhibitor |              |          |      |
| Angiotensin receptor antagonist         |              |          |      |
| Renin inhibitor                         |              |          |      |
| β-receptor antagonist                   |              |          |      |
| Calcium channel blocker                 |              |          |      |
| Diuretic                                |              |          |      |
| α-receptor antagonist                   |              |          |      |
| Centrally acting                        |              |          |      |
| Other                                   |              |          |      |
| Blood pressure, number taken, median    |              |          |      |
| 0 (%) Δ                                 |              |          |      |
| 1 (%)                                   |              |          |      |
| 2 (%)                                   |              |          |      |
| 3 (%)                                   |              |          |      |
| 4 (%)                                   |              |          |      |
| 5 (%)                                   |              |          |      |
| 6 (%)                                   |              |          |      |
| ...                                     |              |          |      |

---

**2. Table 2. Compliance**

**2.1 Both GTN/no GTN and Continue/Stop publications**

Table 2. Compliance and reasons for non-compliance from randomised treatment. Patients receiving at least first 4 doses are considered to have had full treatment. Data are number (%) Comparison of total withdrawals by binary logistic regression with 95% confidence intervals.

| Reasons for non-compliance                    | All | GTN      | No GTN |
|-----------------------------------------------|-----|----------|--------|
| Reasons for non-compliance                    | All | Continue | Stop   |
| Participants randomised                       |     |          |        |
| Compliance                                    |     |          |        |
| Received all 7 days of treatment              |     |          |        |
| Received first 4 days of treatment            |     |          |        |
| Received first treatment                      |     |          |        |
| Did not receive any randomised treatment      |     |          |        |
| Non-compliance by day 4 (%)                   |     |          |        |
| Discharged                                    |     |          |        |
| Physician withdrew participant                |     |          |        |
| Adverse event, unacceptable                   |     |          |        |
| Headache                                      |     |          |        |
| Serious adverse event                         |     |          |        |
| Consent withdrawal by participant or relative |     |          |        |
| Death                                         |     |          |        |
| Other                                         |     |          |        |

Odds ratio= , 95% confidence interval = - , 2p= .

Note: Patients who were randomised to GTN and were discharged before day 7 were given their remaining GTN patches to take in the community



**3 Table 3. Outcomes**

**3.1 Both GTN/no GTN and Continue/Stop publications**

Table 3. Primary and secondary outcomes at 7 and 90 days. Data are number (%), median [interquartile quartile range] or mean (standard deviation). Comparison by binary logistic regression, ordinal logistic regression, or multiple linear regression, shown as odds ratio (OR) median [interquartile range] or mean difference (MD), with 95% confidence intervals. Analyses are adjusted unless stated.

| Outcome                                          | GTN      | No GTN | OR/MD (95% CI), adjusted | 2p |
|--------------------------------------------------|----------|--------|--------------------------|----|
| Outcome                                          | Continue | Stop   | OR/MD (95% CI), adjusted | 2p |
| <i>Primary outcome</i>                           |          |        |                          |    |
| Modified Rankin Scale (/6)                       |          |        | OR                       |    |
| <i>Sensitivity analyses</i>                      |          |        |                          |    |
| mRS (/6), adjusted plus geographical region      |          |        |                          |    |
| mRS (/6), unadjusted                             |          |        |                          |    |
| mRS>2                                            |          |        |                          |    |
| mRS>2, unadjusted                                |          |        |                          |    |
| Global outcome                                   | -        | -      |                          |    |
| <i>Secondary outcomes</i>                        |          |        |                          |    |
| <i>Day 7 (or discharge)</i>                      |          |        |                          |    |
| Death, by cause (%)                              |          |        |                          |    |
| Stroke progression                               |          |        | -                        |    |
| Recurrent stroke                                 |          |        | -                        |    |
| Intra-cranial bleeding                           |          |        | -                        |    |
| Extra-cranial bleeding                           |          |        | -                        |    |
| Myocardial infarction                            |          |        | -                        |    |
| Other cardiovascular cause                       |          |        | -                        |    |
| Pulmonary embolism                               |          |        | -                        |    |
| Pneumonia                                        |          |        | -                        |    |
| Other sudden death                               |          |        | -                        |    |
| Other cause                                      |          |        | -                        |    |
| Other infection                                  |          |        | -                        |    |
| Symptomatic intracranial haemorrhage (%)         |          |        |                          |    |
| Major extracranial haemorrhage (%)               |          |        |                          |    |
| Symptomatic recurrent stroke, all (%)            |          |        |                          |    |
| Ischaemic                                        |          |        | -                        |    |
| Haemorrhage                                      |          |        | -                        |    |
| Unknown                                          |          |        | -                        |    |
| Scandinavian Stroke Scale (SSS, /58) †           |          |        |                          |    |
| NIH Stroke Scale (/42), calculated <sup>40</sup> |          |        |                          |    |
| Clinical deterioration (%) †                     |          |        |                          |    |
| Neurological deterioration (%)                   |          |        |                          |    |
| Headache (%)                                     |          |        |                          |    |
| Hypotension (%)                                  |          |        |                          |    |
| Hypertension (%)                                 |          |        |                          |    |
| Venous thromboembolism (%)                       |          |        |                          |    |

**CONFIDENTIAL: ENOS SAP APPENDIX 20130811**

*Hospital events*

Hospital stay (days)

Discharged home (%)

*Day 90*

Death (%)

Barthel Index (BI, /100) †

Barthel Index <60 (%)

Zung Depression Scale (ZDS, /100) †

EQ-5D Health Utility Status (HUS, /1) †

EQ-Visual Analogue Scale (EQ-VAS,  
/100) †

---

† Neurological deterioration: decrease in SSS >4 points and/or decrease in consciousness on SSS >2 points; ‡: Death assigned, SSS -1, BI -5, ZDS 102.5, HUS 0, VAS -1

**4 Table 4. Serious adverse events**

**4.1 Both GTN/no GTN and Continue/Stop publications**

Table 4. Serious adverse events up to day 90. Data are number (%) of affected patients. Comparison by binary logistic regression.

| Number (%)                             | Median time to event (days) | All      |        |    | Fatal    |        |    |
|----------------------------------------|-----------------------------|----------|--------|----|----------|--------|----|
|                                        |                             | GTN      | No GTN | 2p | GTN      | No GTN | 2p |
| Cause                                  |                             | Continue | Stop   | 2p | Continue | Stop   | 2p |
| <i>Neurological</i>                    |                             |          |        |    |          |        |    |
| Complication of initial stroke         |                             |          |        |    |          |        |    |
| Extension of initial stroke            |                             |          |        |    |          |        |    |
| Haemorrhagic transformation of infarct |                             |          |        |    |          |        |    |
| Intracerebral bleed                    |                             |          |        |    |          |        |    |
| Recurrent stroke                       |                             |          |        |    |          |        |    |
| <i>Cardiac</i>                         |                             |          |        |    |          |        |    |
| Cardiac failure                        |                             |          |        |    |          |        |    |
| Hypertension                           |                             |          |        |    |          |        |    |
| Hypotension                            |                             |          |        |    |          |        |    |
| Myocardial infarction                  |                             |          |        |    |          |        |    |
| Sudden cardiac death                   |                             | -        | -      | -  |          |        |    |
| <i>Gastrointestinal</i>                |                             |          |        |    |          |        |    |
| Bleed                                  |                             |          |        |    |          |        |    |
| Infarction                             |                             |          |        |    |          |        |    |
| <i>Respiratory</i>                     |                             |          |        |    |          |        |    |
| Pneumonia                              |                             |          |        |    |          |        |    |
| Pulmonary embolism                     |                             |          |        |    |          |        |    |
| <i>Other</i>                           |                             |          |        |    |          |        |    |
| Death, unattended                      |                             | -        | -      | -  |          |        |    |
| Extracranial bleeding                  |                             |          |        |    |          |        |    |
| Malignancy/cancer                      |                             |          |        |    |          |        |    |
| Septicaemia                            |                             |          |        |    |          |        |    |
| Urinary tract infection                |                             |          |        |    |          |        |    |
| Renal impairment                       |                             |          |        |    |          |        |    |
| Electrolyte imbalance                  |                             |          |        |    |          |        |    |

**4.2 Continue vs stop pre-stroke antihypertensive medications**

Table 4a. Specific serious adverse events up to day 90 by antihypertensive drug class (where >15% of patients were taking the class) and by number of drug classes (where >15% of patients were taking that number of drugs). Data are number (%) of affected patients; the percentage of affected patients across drug classes may exceed 100%. Comparison by binary logistic regression.

| Number (%) | Median time to event (days) | All      |      |    | Fatal    |      |    |
|------------|-----------------------------|----------|------|----|----------|------|----|
|            |                             | Continue | Stop | 2p | Continue | Stop | 2p |
| Cause      |                             |          |      |    |          |      |    |

*Drug class*

- ACE-I or ARB
- β-receptor antagonist
- Calcium channel blocker
- Diuretic
- Other BP classes

†

*Number of drugs*

(%)

- 1
- 2
- 3
- 4
- >4

---

† Other BP classes: alpha-receptor antagonist, centrally acting drugs, renin inhibitor

Index stroke-related:

Any of: complication of initial stroke, extension of initial stroke, recurrent stroke, haemorrhagic transformation of stroke; intracerebral bleed, recurrent stroke.

If the analysis shows a treatment-related stroke, the comparison will then be performed for each of these components.

**5 Table 5. Protocol violations**

**5.1 Both GTN/no GTN and Continue/Stop publications**

Table 5. Protocol violations by treatment group. Data are number (%).

|                                                          | GTN      | No GTN |
|----------------------------------------------------------|----------|--------|
|                                                          | Continue | Stop   |
| Inclusion criteria                                       |          |        |
| Failure to obtain consent/assent                         |          |        |
| Age <18 years                                            |          |        |
| Time >48 hours                                           |          |        |
| GCS <8 (/15)                                             |          |        |
| No limb weakness                                         |          |        |
| No SBP <220 or >140 mmHg                                 |          |        |
| Known non-stroke intracranial pathology                  |          |        |
| No brain imaging or autopsy                              |          |        |
| Treatment                                                |          |        |
| Received antihypertensive drug(s) prior to randomisation |          |        |

In addition, for GTN vs no GTN

|                                                               | Continue | Stop |
|---------------------------------------------------------------|----------|------|
| Treatment                                                     |          |      |
| Failure to stop pre-stroke nitrate treatment                  |          |      |
| Failure to receive GTN for $\geq 4$ days if randomised to GTN |          |      |
| Received any GTN during first 4 days if randomised to no GTN  |          |      |

In addition, for continue versus stop pre-stroke antihypertensive drugs

|                                                                                    | Continue | Stop |
|------------------------------------------------------------------------------------|----------|------|
| Inclusion criteria                                                                 |          |      |
| Enrolled but not on a pre-stroke antihypertensive agent                            |          |      |
| Treatment                                                                          |          |      |
| Received usual antihypertensive drug(s) before randomisation                       |          |      |
| Received usual or new antihypertensive drug(s) when randomised to stop             |          |      |
| Failure to receive pre-stroke antihypertensive drug(s) when randomised to continue |          |      |

**6 Table A. Blood pressure**

**6.1 Both GTN/no GTN and Continue/Stop publications**

Table A. Blood pressure, systolic/diastolic (mmHg) course over 7 days of treatment. Data are mean (standard deviation) [number]. Comparison by t test with adjustment for multiple comparisons using Bonferroni correction.

| Day                   | GTN | No GTN | Difference (SBP/DBP) | 2p |
|-----------------------|-----|--------|----------------------|----|
| 0, baseline           |     |        | -                    | -  |
| 1, 2 hours post patch |     |        |                      |    |
| 2                     |     |        |                      |    |
| 3                     |     |        |                      |    |
| 4                     |     |        |                      |    |
| 5                     |     |        |                      |    |
| 6                     |     |        |                      |    |
| 7                     |     |        |                      |    |

Note: PLAN IS TO SHOW THIS AS A FIGURE BUT NUMBERS NEEDED IN FIRST INSTANCE

**7 Table B. mRS by treatment assignment**

**7.1 Both GTN/no GTN and Continue/Stop publications**

| <i>mRS</i> | 0      | 1 | 2 | 3 | 4 | 5 | Death |
|------------|--------|---|---|---|---|---|-------|
| GTN        | N1 (%) | . | . | . | . | . | .     |
| No GTN     | .      | . | . | . | . | . | .     |

**8 Table C. Outcome by sub-groups**

**8.1 Both GTN/no GTN and Continue/Stop publications**

Effect of GTN vs no GTN on mRS at day 90 in subgroups defined at baseline. Data are odds ratio (95% confidence intervals) and interaction test. Comparison by ordinal logistic regression.

| <b>Variable</b>                      | <b>GTN</b>      | <b>No GTN</b> | <b>OR<br/>(95% CI)</b> | <b>Interaction p</b> |
|--------------------------------------|-----------------|---------------|------------------------|----------------------|
| <b>Variable</b>                      | <b>Continue</b> | <b>Stop</b>   | <b>OR<br/>(95% CI)</b> | <b>Interaction p</b> |
| Age, ≤70                             |                 |               |                        |                      |
| Age, >70                             |                 |               |                        | -                    |
| Sex, female                          |                 |               |                        |                      |
| Sex, male                            |                 |               |                        | -                    |
| History of hypertension, no          |                 |               |                        |                      |
| History of hypertension, yes         |                 |               |                        | -                    |
| Stroke, ischaemic                    |                 |               |                        |                      |
| Stroke, ICH                          |                 |               |                        | -                    |
| Stroke syndrome, LACS                |                 |               |                        |                      |
| Stroke syndrome, PACS                |                 |               |                        | -                    |
| Stroke syndrome, POCS                |                 |               |                        | -                    |
| Stroke syndrome, TACS                |                 |               |                        | -                    |
| Stroke severity, SSS >40             |                 |               |                        |                      |
| Stroke severity, SSS 30-40           |                 |               |                        | -                    |
| Stroke severity, SSS <30             |                 |               |                        | -                    |
| Systolic BP, <160                    |                 |               |                        |                      |
| Systolic BP, 161-180                 |                 |               |                        | -                    |
| Systolic BP, 181-200                 |                 |               |                        | -                    |
| Systolic BP, >200                    |                 |               |                        | -                    |
| AF, absent                           |                 |               |                        |                      |
| AF, present                          |                 |               |                        | -                    |
| Feeding, oral                        |                 |               |                        |                      |
| Feeding, not oral                    |                 |               |                        | -                    |
| Ipsilateral carotid stenosis, 0-49%  |                 |               |                        |                      |
| Ipsilateral carotid stenosis, 50-69% |                 |               |                        | -                    |
| Ipsilateral carotid stenosis, 70-99% |                 |               |                        | -                    |
| Ipsilateral carotid stenosis, 100%   |                 |               |                        | -                    |
| Time to randomisation, <6 hr         |                 |               |                        |                      |
| Time to randomisation, 6.1-12        |                 |               |                        | -                    |
| Time to randomisation, 12.1-24       |                 |               |                        | -                    |
| Time to randomisation, 24.1-36       |                 |               |                        | -                    |
| Time to randomisation, >36           |                 |               |                        | -                    |
| Treatment, alteplase                 |                 |               |                        |                      |
| Treatment, no alteplase              |                 |               |                        | -                    |
| All patients                         |                 |               |                        |                      |

GTN vs no GTN paper

| <b>Variable</b> | <b>GTN</b> | <b>No GTN</b> | <b>OR<br/>(95% CI)</b> | <b>Interaction p</b> |
|-----------------|------------|---------------|------------------------|----------------------|
|-----------------|------------|---------------|------------------------|----------------------|

**CONFIDENTIAL: ENOS SAP APPENDIX 20130811**

|                                        |  |  |  |   |
|----------------------------------------|--|--|--|---|
| History of recent nitrate, no          |  |  |  |   |
| History of recent nitrate, yes         |  |  |  | - |
| Pre-stroke BP medication, not relevant |  |  |  |   |
| Pre-stroke BP medication, continue     |  |  |  |   |
| Pre-stroke BP medication, stop         |  |  |  |   |

Continue vs stop pre-stroke BP medications paper

| <b>Variable</b>            | <b>Continue</b> | <b>Stop</b> | <b>OR<br/>(95% CI)</b> | <b>Interaction p</b> |
|----------------------------|-----------------|-------------|------------------------|----------------------|
| BP class, ACE-I/ARA/RI     |                 |             |                        |                      |
| BP class, $\beta$ -RA      |                 |             |                        | -                    |
| BP class, CCB              |                 |             |                        |                      |
| BP class, diuretic         |                 |             |                        |                      |
| BP class, centrally acting |                 |             |                        |                      |
| BP class, other            |                 |             |                        |                      |
| No. of BP drugs, 1         |                 |             |                        |                      |
| No. of BP drugs, 2         |                 |             |                        |                      |
| No. of BP drugs, 3         |                 |             |                        |                      |
| No. of BP drugs, 4         |                 |             |                        |                      |
| No. of BP drugs, >4        |                 |             |                        |                      |
| Randomised to GTN          |                 |             |                        |                      |
| Randomised to no GTN       |                 |             |                        |                      |

NOTE: These tables will be presented as a Forest plot.



**9 Figure 1. Trial flow diagram**

**9.1 Both GTN/no GTN and Continue/Stop publications**

Figure 1. CONSORT flow diagram of patient randomisation, outcome, and losses to follow-up. Screening for eligibility was not collected routinely. Data are number (%).

| Randomised                                       | ↙<br>GTN<br>Continue | ↘<br>No GTN<br>Stop |
|--------------------------------------------------|----------------------|---------------------|
| Treatment allocation                             |                      |                     |
| Number allocated ( <i>safety population</i> )    |                      |                     |
| Baseline data completed                          |                      |                     |
| Adherence to allocation                          | ↓                    | ↓                   |
| Any GTN or no GTN ( <i>efficacy population</i> ) |                      |                     |
| First dose of GTN or no GTN                      |                      |                     |
| ≥ 4days of GTN or no GTN (s)                     |                      |                     |
| All 7 days of GTN or no GTN                      |                      |                     |
| Day 7 follow-up (end of treatment)               | ↓                    | ↓                   |
| Death by day 7                                   |                      |                     |
| Day 7 assessment completed                       |                      |                     |
| <4 days                                          |                      |                     |
| 7-10 days (per protocol)                         |                      |                     |
| >10 days                                         |                      |                     |
| Day 7 assessment missing                         |                      |                     |
| Patient refused                                  |                      |                     |
| Logistical problem                               |                      |                     |
| Other reason                                     |                      |                     |
| Hospital discharge or death                      | ↓                    | ↓                   |
| Death in hospital                                |                      |                     |
| Hospital event form completed                    |                      |                     |
| Before day 90 follow-up                          |                      |                     |
| On day 90 follow-up                              |                      |                     |
| Hospital event form missing                      |                      |                     |
| Patient refused                                  |                      |                     |
| Logistical problem                               |                      |                     |
| Other reason                                     |                      |                     |
| Day 90 follow-up (end of follow-up)              | ↓                    | ↓                   |
| Death by day 90                                  |                      |                     |
| No vital status available                        |                      |                     |
| Day 90 assessment completed                      |                      |                     |
| <83 days                                         |                      |                     |
| 83-97 days (per protocol)                        |                      |                     |
| >97 days                                         |                      |                     |
| Day 90 mRS assessment missing                    |                      |                     |
| Patient lost to follow-up                        |                      |                     |
| Patient refused                                  |                      |                     |
| Logistical problem                               |                      |                     |
| Other                                            |                      |                     |

**10 Figure 2. Blood pressure profile**

**10.1 Both GTN/no GTN and Continue/Stop publications**

Figure 2. Blood pressure during 7 days of treatment.  $\Delta$ SBP and  $\Delta$ DBP signify mean difference in systolic and diastolic blood pressure between the two groups; p values were calculated with the independent sample *t* test, and are for difference in systolic blood pressure between groups.

See table A for source data.

**11 Figure 3. Modified Rankin Scale distribution**

**11.1 Both GTN/no GTN and Continue/Stop publications**

Figure 3. Modified Rankin Scale (mRS) at 90 days follow-up. Distribution of mRS scores by treatment group. Comparison by ordinal logistic regression adjusted for baseline factors.

See table B for source data.

**12 Figure 4. Primary outcome in pre-specified subgroups**

**12.1 Both GTN/no GTN and Continue/Stop publications**

Figure 4. Subgroup analysis of effects on functional outcome at 90 days. Pre-defined subgroups are listed in section 4.4.3.

See table C for source data.

**13 Figure 5. Survival curve**

**13.1 Both GTN/no GTN and Continue/Stop publications**

Figure 5. Cumulative hazard of death during the 90 days of follow-up after randomisation. Cox proportional regression with adjustment for baseline covariates, hazard ratio= (95% CI - ), p= .

**CONFIDENTIAL: ENOS SAP APPENDIX 20130811**

**14 Figure 6. Meta-analysis of relevant trials**

**14.1 GTN/no**

Figure 6. Meta-analysis of trials in acute stroke involving drugs which lower blood pressure and which included more than 100 patients: effect on death or dependency

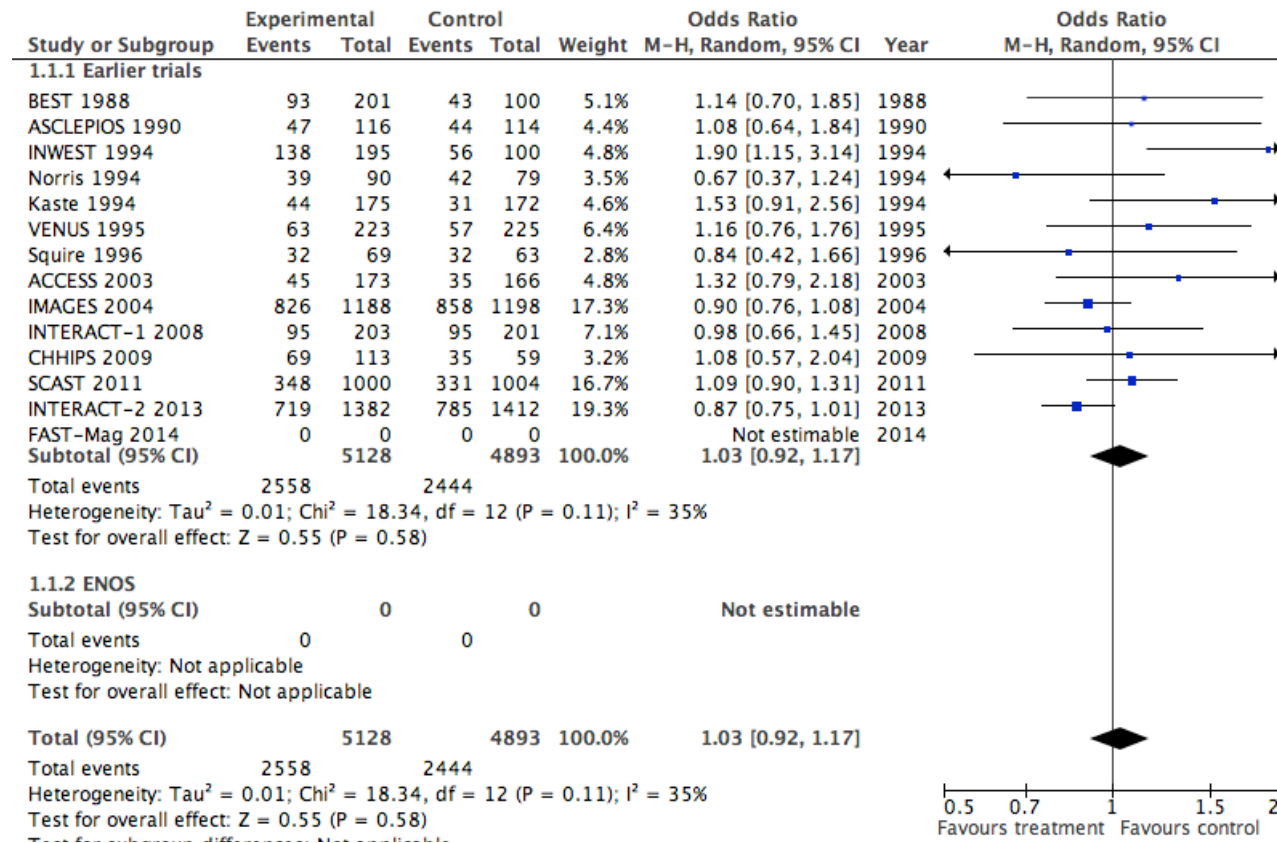

14.2 Continue/stop

Figure 6. Meta-analysis of trials in acute stroke comparing continuing versus stopping pre-stroke antihypertensive drugs and which included more than 100 patients: effect on death or dependency

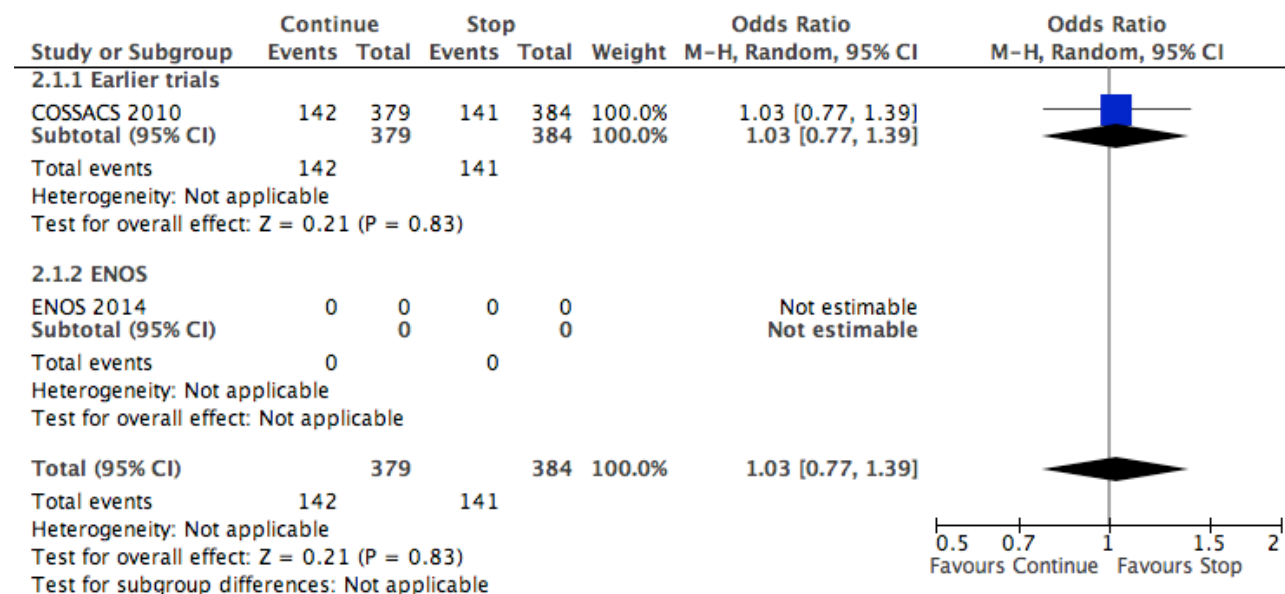

**APPENDIX D. SECONDARY PUBLICATIONS**

**1 PUBLISHED**

- a. Protocol <sup>15</sup>
- b. The NeuroGrid stroke exemplar clinical trial protocol <sup>41</sup>
- c. Efficacy of Nitric Oxide in Stroke – a randomized trial. Characteristics of patients recruited in Poland<sup>16</sup>
- d. The Efficacy of Nitric Oxide in Stroke (ENOS) trial – where do we stand in Romania? <sup>20</sup>
- e. Safety and efficacy of lowering BP in patients with severe carotid stenosis <sup>42</sup>
- f. Effect of the neutral CLOTS-1 trial on the use of graduated compression stockings in the Efficacy of Nitric Oxide Stroke (ENOS) trial <sup>18</sup>
- g. Testing for differential item functioning within the EQ-5D <sup>19</sup>
- h. Comparison of small volume infarcts of lacunar and non-lacunar aetiologies <sup>43</sup>

**2 SUBMITTED**

- a. Relationship between cognitive impairment after stroke, baseline factors and functional outcome: Data from ENOS trial
- b. Very low quality of life after acute stroke: data from the Efficacy of Nitric Oxide in Stroke (ENOS) trial. Stroke

**3 IN PREPARATION**

- a. Methods for quantifying and qualifying intracerebral haemorrhage
- b. Baseline characteristics. (To be submitted once last patient recruited. Appendix E)

**4 PLANNED PUBLICATIONS**

**4.1 Treatment-related**

- a. The nitric oxide donor glyceryl trinitrate for treatment of acute stroke: the Efficacy of Nitric Oxide in Stroke (ENOS) randomised controlled trial (ISRCTN99414122). (Primary publication. Appendix C)
- b. Continuing versus temporary stopping of pre-stroke antihypertensive therapy in patients with in acute stroke: the Efficacy of Nitric Oxide in Stroke (ENOS) randomised controlled trial (ISRCTN99414122). (Primary publication. Appendix C)
- c. Glyceryl trinitrate and/or continuing pre-stroke antihypertensive medications in acute ischaemic stroke. (Appendix F)
- d. Glyceryl trinitrate and/or continuing pre-stroke antihypertensive medications in acute spontaneous intracerebral haemorrhage. (Appendix G)
- e. Glyceryl trinitrate for reducing cognition, quality of life and mood after stroke
- f. Continuing versus stopping pre-stroke antihypertensive medication for reducing cognition, quality of life and mood after stroke
- g. GTN-no GTN/Continue-stop and scan outcome at day 7 (Appendix E)
- h. GTN, headache and outcome (Appendix F)
- i. Effect of GTN on dysphagia (Appendix H)
- j. Relationship between treatment-related change in blood pressure and outcome (as in SCAST <sup>44</sup>)
- k. Effect of GTN on haemodynamic parameters: systolic and diastolic BP, heart rate, pulse pressure, peak BP, BP variability, rate-pressure product and their

## **CONFIDENTIAL: ENOS SAP APPENDIX 20130811**

relationship to outcome (as in <sup>45</sup>)

- l. Health economics of GTN vs no GTN and/or Continue vs stop (if positive primary outcome)

### **4.2 'Epidemiological' (not treatment-related)**

- a. Comparison of functional outcomes between countries (as in <sup>46-48</sup>)
- b. Outcomes in UK
- c. Identification of baseline phenotypic factors that predict cognitive outcomes

### **4.3 Systematic reviews/meta-analyses**

- a. Temporal effects of GTN on outcome, a meta-analysis of individual patient data from randomised controlled trials of GTN (Appendix M)
- b. Comparison of continuing or temporary stopping pre-stroke antihypertensive medication: a prospective meta-analysis of individual patient data from randomised controlled trials (Appendix N). (A draft paper, based on merging data from ENOS, COSSACS,<sup>49</sup> and any other relevant trial(s), was written prior to the unblinding of COSSACS.)
- c. Nitric oxide donors (nitrates), L-arginine, or nitric oxide synthase inhibitors in acute ischaemic stroke.<sup>50</sup> Update of this Cochrane Database of Systematic Review
- d. Vasoactive drugs for acute stroke.<sup>51</sup> Update of this Cochrane Database of Systematic Review
- e. Interventions for deliberately altering blood pressure in acute stroke.<sup>52</sup> Update of this Cochrane Database of Systematic Review
- f. Blood pressure in Acute Stroke Collaboration: Intracerebral haemorrhage
- g. Blood pressure in Acute Stroke Collaboration: Ischaemic stroke
- h. Blood pressure in Acute Stroke Collaboration: All stroke

**APPENDIX E. PLANNED PUBLICATION: BASELINE DATA**

**Authorship**

To be decided.

**Title**

Characterisation of patients enrolled into the 'Efficacy of Nitric Oxide' in Stroke (ENOS) trial.

**Authors**

Members of Trial Steering Committee, International Advisory Committee and Trial Management Committee.

**Aim**

To characterise the patients enrolled into ENOS. For submission after enrolment of the last patient in quarter 4 2013.

**Patients**

All randomised patients.

**Table 1**

Recruitment: number of sites and patients by country

| Country                 | No. of sites | No. of patients | %   |
|-------------------------|--------------|-----------------|-----|
| Australia               |              |                 |     |
| Canada                  |              |                 |     |
| China                   |              |                 |     |
| Denmark                 |              |                 |     |
| Egypt                   |              |                 |     |
| Eire                    |              |                 |     |
| Georgia                 |              |                 |     |
| Greece                  |              |                 |     |
| Hong Kong               |              |                 |     |
| India                   |              |                 |     |
| Italy                   |              |                 |     |
| Malaysia                |              |                 |     |
| Norway                  |              |                 |     |
| New Zealand             |              |                 |     |
| Philippines             |              |                 |     |
| Poland <sup>16</sup>    |              |                 |     |
| Romania <sup>20</sup>   |              |                 |     |
| Singapore <sup>43</sup> |              |                 |     |
| Sri Lanka               |              |                 |     |
| Spain                   |              |                 |     |
| Sweden                  |              |                 |     |
| Turkey                  |              |                 |     |
| UK                      |              |                 |     |
| TOTAL                   |              |                 | 100 |

**Table 2.**

Clinical characteristics at baseline. Data are number (%), median [interquartile range] or mean (standard deviation).

|                                                       | All patients | Continue-stop | Not in continue-stop |
|-------------------------------------------------------|--------------|---------------|----------------------|
| No. of patients                                       |              |               |                      |
| Age (years)                                           |              |               |                      |
| <18 (%) ¶                                             |              |               |                      |
| 18-40 (%)                                             |              |               |                      |
| 41-50 (%)                                             |              |               |                      |
| 51-60 (%)                                             |              |               |                      |
| 61-70 (%)                                             |              |               |                      |
| 71-80 (%)                                             |              |               |                      |
| 81-90 (%)                                             |              |               |                      |
| 91-100 (%)                                            |              |               |                      |
| >100 (%)                                              |              |               |                      |
| Mean (SD) †                                           |              |               |                      |
| Sex                                                   |              |               |                      |
| Male (%) †                                            |              |               |                      |
| Female (%)                                            |              |               |                      |
| Geographical region ‡                                 |              |               |                      |
| Africa                                                |              |               |                      |
| America, north                                        |              |               |                      |
| Asia, east                                            |              |               |                      |
| Asia, south                                           |              |               |                      |
| Asia, south-east                                      |              |               |                      |
| Australasia                                           |              |               |                      |
| British Isles                                         |              |               |                      |
| Europe, mainland                                      |              |               |                      |
| Medical history (%)                                   |              |               |                      |
| Hypertension                                          |              |               |                      |
| Treated hypertension ‡                                |              |               |                      |
| Hyperlipidaemia                                       |              |               |                      |
| Diabetes mellitus                                     |              |               |                      |
| Atrial fibrillation, current/previous                 |              |               |                      |
| Stroke                                                |              |               |                      |
| Transient ischaemic attack                            |              |               |                      |
| Ischaemic heart disease                               |              |               |                      |
| Peripheral arterial disease                           |              |               |                      |
| Family history of young stroke, first degree relative |              |               |                      |
| Smoking (%)                                           |              |               |                      |
| Current                                               |              |               |                      |
| Past                                                  |              |               |                      |
| Never                                                 |              |               |                      |
| Alcohol, median [upw]                                 |              |               |                      |
| >21 units per week                                    |              |               |                      |
| <21                                                   |              |               |                      |
| None                                                  |              |               |                      |
| Pre-morbid modified Rankin Scale [/2]                 |              |               |                      |
| mRS 0                                                 |              |               |                      |
| mRS 1                                                 |              |               |                      |
| mRS 2                                                 |              |               |                      |
| mRS>2 ¶                                               |              |               |                      |
| Medications (%)                                       |              |               |                      |
| Blood pressure lowering                               |              |               |                      |



**CONFIDENTIAL: ENOS SAP APPENDIX 20130811**

Angiotensin converting enzyme  
inhibitor  
Angiotensin receptor antagonist  
Renin inhibitor  
 $\beta$ -receptor antagonist  
Calcium channel blocker  
Diuretic  
 $\alpha$ -receptor antagonist  
Centrally acting  
Other  
Blood pressure tablets, number taken  
Mean (SD)  
Median [IQR]  
Mode  
0 (%)  
1 (%)  
2 (%)  
3 (%)  
4 (%)  
>4 (%)  
Lipid lowering  
Nitrate  
Side of lesion, right (%)  
Scandinavian Stroke Scale (/58)  
Mean (SD) †  
Median [IQR]  
51-58  
41-50  
31-40  
21-30  
11-20  
0-10  
NIHSS (/42), calculated <sup>40</sup>  
Glasgow Coma Scale [/15]  
15  
14  
13  
12  
11  
10  
9  
<9 ¶  
OCSP classification (%)  
Total anterior †  
Partial anterior  
Lacunar  
Posterior  
TOAST classification (%) Ω‡  
Cardioembolic  
Large vessel  
Small vessel/lacunar  
Mixed  
Unknown  
Haemodynamics

**CONFIDENTIAL: ENOS SAP APPENDIX 20130811**

Systolic blood pressure (mmHg)  
    <140 (mmHg)  
    140-160 (mmHg)  
    161-180 (mmHg)  
    181-200 (mmHg)  
    201-220 (mmHg)  
    >220 (mmHg)  
    Mean (SD) †  
Diastolic blood pressure, mean (mmHg)  
Heart rate, mean (bpm)  
Temperature (°C)  
Glucose (mmol/l)  
Feeding (%)  
    Normal diet  
    Soft diet  
    Nasogastric fed  
    PEG-fed  
    Intravenous/subcutaneous fluids  
    Nil  
Time stroke-randomisation (hours)  
    <1 (%) ¶  
    1-6 (%)  
    7-12 (%)  
    13-18 (%)  
    19-24 (%)  
    25-36 (%)  
    37-48 (%)  
    >48 (%) ¶  
    Median [IQR]  
    Mean (SD) †  
Thrombolysis, given †  
Qualifying event, by investigator (%) †  
    Ischaemic  
        Ischaemic stroke, no lesion on brain scan  
        Ischaemic stroke, lesion on brain scan  
        Haemorrhagic transformation of infarct  
    Not known  
    Intracerebral haemorrhage  
    Stroke type unknown  
    Non-stroke

---

† Minimisation variable; ‡ Stratification variable; Ω Ischaemic only; ∫ May exceed 100%; ¶ Protocol violation  
bpm: beats per minute; NIHSS: National Institutes of Health Stroke Scale; TOAST: Trial of ORG 10172 in Acute Stroke Treatment

**Table 3. Issues with the trial.**

| <b>Issue</b>                            | <b>Explanation</b>                                                                                                                                                                                                                                                      | <b>Effect/Response</b>                                                                       |
|-----------------------------------------|-------------------------------------------------------------------------------------------------------------------------------------------------------------------------------------------------------------------------------------------------------------------------|----------------------------------------------------------------------------------------------|
| Sponsorship                             | Insurance and contracting issues prevented a number of countries from participating in ENOS.                                                                                                                                                                            | Reduced world coverage and recruitment.                                                      |
| Recruitment, rate low                   | Recruitment limited by: Severe acute respiratory syndrome (SARS), Bird flu, competing trials, trial fatigue.                                                                                                                                                            | Delayed recruitment at various sites, especially in Singapore.                               |
| Recruitment, rate too high              | Two sites over-recruited:<br>Site A: Outcome was poorly recorded, and had several losses to follow-up. A limited number of scans were available.<br>Site B: Review of baseline and follow-up data, consent forms, treatment charts and brain scans revealed no problem. | A: Site closed.<br>B: No action.                                                             |
| Recruitment, delayed                    | Tendency for patients to be recruited during day 2, in spite of repeated requests to investigators to focus on recruiting patients at the time of presentation to hospital.                                                                                             | Extended mean time to recruitment.                                                           |
| Randomisation to continue/stop          | Patients not on pre-stroke antihypertensive drugs randomised in error (N= ).                                                                                                                                                                                            | Sites training on inclusion criteria                                                         |
| Non-randomisation to continue/stop      | Patients on pre-stroke antihypertensive drugs not randomised because drug(s) not recognised as an antihypertensive (N= ).                                                                                                                                               | Sites given full international list of anti-hypertensive agents.                             |
| Non-availability of placebo GTN patches | Placebo patches were made available by one manufacturer for the first pilot trial. <sup>10</sup> Pilot trials 2-4 used a single-blind design with GTN patch (or similar area of skin) covered by a gauze dressing. <sup>11-13</sup>                                     | ENOS designed as single-blind study as for pilot trials 2-4.                                 |
| Loss of availability of GTN patches     | In China, GTN patches were sourced from a local manufacturer. A reduction in the national reimbursement for manufacturing these patches meant that the company ceased their production. Importation of patches from overseas proved too complicated to organise.        | Cessation of recruitment in China.                                                           |
| Inappropriate GTN treatment             | GTN given open-label to all patients at one site irrespective of randomisation.                                                                                                                                                                                         | Data from this site excluded from all analyses (exclusion in 2012, i.e. prior to data lock). |
| Theft of data                           | Theft of paper case report forms and brain scan films from one site relating to patients.                                                                                                                                                                               | Missing follow-up and CT scan data.                                                          |
| Withdrawals                             | Withdrawal from follow-up (N= ) or lost to follow-up (N= ).                                                                                                                                                                                                             | Missing primary outcome data.                                                                |



**Table 4. Univariate correlations between baseline characteristics for: age, sex, stroke severity (Scandinavian Stroke Scale, SSS), stroke pathological type (ischaemic, haemorrhage), systolic blood pressure (SBP), time to randomisation, and year of randomisation. Correlations by point biserial or Spearman’s tests; data are regression coefficient and p value.**

|          | Age | Sex, male | Severity (SSS) | Stroke type, bleed | Systolic BP | Time to randomisation | Year of randomisation |
|----------|-----|-----------|----------------|--------------------|-------------|-----------------------|-----------------------|
| Age      | X   |           |                |                    |             |                       |                       |
| Sex      |     | X         |                |                    |             |                       |                       |
| Severity |     |           | X              |                    |             |                       |                       |
| Type     |     |           |                | X                  |             |                       |                       |
| SBP      |     |           |                |                    | X           |                       |                       |
| Time     |     |           |                |                    |             | X                     |                       |
| Year     |     |           |                |                    |             |                       | X                     |

**Figure 1. Recruitment curve throughout the trial.**

**Figure 2. Scatterplots and box and whisker plots showing univariate-relationships between baseline variables**

Scatterplots and box-and-whisker plots of (i) age versus stroke severity (Scandinavian Stroke Scale, SSS); (ii) age vs systolic blood pressure (SBP); (iii) SSS vs SBP; (iv) Time stroke-randomisation vs SBP; (v) Time stroke-randomisation vs SSS.

**APPENDIX A. ENOS protocol version 1.5 – latest/current version**

**APPENDIX B. ENOS protocol version 1.5 - signed front page.**

**APPENDIX F. PLANNED PUBLICATION: GLYCERYL TRINITRATE AND/OR CONTINUING PRE-STROKE ANTIHYPERTENSIVE MEDICATIONS IN ACUTE ISCHAEMIC STROKE**

**Authorship**

Kailash Krishnan, ..., Rob Dineen, Joanna Wardlaw, Philip Bath

**Title**

Glyceryl trinitrate and/or continuing pre-stroke antihypertensive medications in acute ischaemic stroke.

**Authors**

To include neuroimaging adjudicators.

**Aim**

To assess the effect of GTN vs no GTN, and continue vs stop temporarily pre-stroke antihypertensive medications, in patients with a final diagnosis of acute ischaemic stroke.

**Patients**

All randomised patients with acute ischaemic stroke, by intention-to-treat.

**Layout**

The publication will follow the format of the two primary publications (baseline characteristics, BP profile, clinical outcomes, SAEs, mRS distribution, survival) but will report the effect of both intervention comparisons (GTN vs no GTN, continue vs stop pre-stroke antihypertensive agents) in patients with acute ischaemic stroke as the final diagnosis. In addition, adjudicated information on baseline imaging data will be described (reporting the imaging variables in the table below), as will the effect of the interventions on day 7 imaging parameters (adjusted for baseline) where available (table).

**Imaging data**

The effect of the interventions on imaging parameters will be assessed where both baseline and day 7 data are present. The method of analysis is given for each imaging parameter.

**Table 1. Baseline IS characteristics**

Baseline demographic, clinical and neuroimaging characteristics of patients with acute ischaemic stroke. Data are number (%), median [interquartile range] or mean (standard deviation).

|                                     | All | GTN | No GTN | Continue | Stop |
|-------------------------------------|-----|-----|--------|----------|------|
| Patients (N)                        |     |     |        |          |      |
| Country, UK (%)                     |     |     |        |          |      |
| Age (years)                         |     |     |        |          |      |
| Sex, male (%)                       |     |     |        |          |      |
| Smoking, current (%)                |     |     |        |          |      |
| Pre-morbid mRS =0 (%)               |     |     |        |          |      |
| Previous stroke (%)                 |     |     |        |          |      |
| Prior antihypertensive drug use (%) |     |     |        |          |      |
| Prior history of high BP (%)        |     |     |        |          |      |

**CONFIDENTIAL: ENOS SAP APPENDIX 20130811**

|                                                                   |  |  |  |  |  |
|-------------------------------------------------------------------|--|--|--|--|--|
| Diabetes mellitus (%)                                             |  |  |  |  |  |
| Ischaemic heart disease (%)                                       |  |  |  |  |  |
| Atrial fibrillation (%)                                           |  |  |  |  |  |
| TACS (%)                                                          |  |  |  |  |  |
| Scandinavian Stroke Scale (/58)                                   |  |  |  |  |  |
| Glasgow Coma Scale [/15]                                          |  |  |  |  |  |
| Systolic blood pressure (mmHg)                                    |  |  |  |  |  |
| Diastolic blood pressure (mmHg)                                   |  |  |  |  |  |
| Heart rate (bpm)                                                  |  |  |  |  |  |
| Onset to neuroimaging (%)                                         |  |  |  |  |  |
| <12 hours                                                         |  |  |  |  |  |
| 12-24 hours                                                       |  |  |  |  |  |
| >24 hours                                                         |  |  |  |  |  |
| Location of infarct (%)                                           |  |  |  |  |  |
| Lobar                                                             |  |  |  |  |  |
| Basal ganglia or thalamus                                         |  |  |  |  |  |
| Brainstem                                                         |  |  |  |  |  |
| Cerebellum                                                        |  |  |  |  |  |
| Undetermined                                                      |  |  |  |  |  |
| Site                                                              |  |  |  |  |  |
| Lesion size: MCA, lacunar, cerebellum or brainstem                |  |  |  |  |  |
| Mass effect, degree                                               |  |  |  |  |  |
| Haemorrhagic Transformation of Infarct                            |  |  |  |  |  |
| Loss of grey-white definition                                     |  |  |  |  |  |
| Loss of basal ganglia outline                                     |  |  |  |  |  |
| Hypodensity                                                       |  |  |  |  |  |
| Hypoattenuation                                                   |  |  |  |  |  |
| Mass effect                                                       |  |  |  |  |  |
| Mass effect score (greatest of Uncal> shift> ventricular> sulcal) |  |  |  |  |  |
| Middle Cerebral Artery 1/3 (if MCA, >1/3, <1/3, no lesion)        |  |  |  |  |  |
| ASPECTS score                                                     |  |  |  |  |  |
| Second lesion                                                     |  |  |  |  |  |
| Hyperdense artery                                                 |  |  |  |  |  |
| Leukoaraiosis                                                     |  |  |  |  |  |
| Previous stroke lesion (%)                                        |  |  |  |  |  |

bpm: beats per minute

**Table 2. Effect of interventions on imaging outcomes at day 7**

Effect of GTN vs no GTN, and continue vs stop temporarily pre-stroke antihypertensive agents, on imaging outcomes at day 7. Data are number (%), median (interquartile range) or mode. Comparisons by binary logistic regression or ordinal logistic regression, with adjustment for age; sex; history of hypertension; previous stroke; diabetes mellitus; current use of nitrate therapy (not for continue vs stop); stroke severity (SSS); total anterior circulation syndrome; systolic BP; treated with rt-PA prior to randomisation; feeding status; and time from onset to randomisation.

| Imaging parameter | GTN | No | OR | p | Continue | Stop | OR | p |
|-------------------|-----|----|----|---|----------|------|----|---|
|-------------------|-----|----|----|---|----------|------|----|---|

**CONFIDENTIAL: ENOS SAP APPENDIX 20130811**

|                                                                   |  |     |  |  |  |  |  |  |
|-------------------------------------------------------------------|--|-----|--|--|--|--|--|--|
|                                                                   |  | GTN |  |  |  |  |  |  |
| Patients (N)                                                      |  |     |  |  |  |  |  |  |
| Recent stroke                                                     |  |     |  |  |  |  |  |  |
| Site                                                              |  |     |  |  |  |  |  |  |
| Lesion size: MCA, lacunar, cerebellum or brainstem                |  |     |  |  |  |  |  |  |
| Mass effect, degree                                               |  |     |  |  |  |  |  |  |
| Haemorrhagic transformation of infarct                            |  |     |  |  |  |  |  |  |
| Loss of grey-white definition                                     |  |     |  |  |  |  |  |  |
| Loss of basal ganglia outline                                     |  |     |  |  |  |  |  |  |
| Hypodensity                                                       |  |     |  |  |  |  |  |  |
| Hypoattenuation                                                   |  |     |  |  |  |  |  |  |
| Mass effect                                                       |  |     |  |  |  |  |  |  |
| Mass effect score (greatest of Uncal> shift> ventricular> sulcal) |  |     |  |  |  |  |  |  |
| Middle cerebral artery 1/3 (if MCA, >1/3, <1/3, no lesion)        |  |     |  |  |  |  |  |  |
| ASPECTS score                                                     |  |     |  |  |  |  |  |  |
| Second lesion                                                     |  |     |  |  |  |  |  |  |
| Hyperdense artery                                                 |  |     |  |  |  |  |  |  |
| PVL                                                               |  |     |  |  |  |  |  |  |
| Atrophy                                                           |  |     |  |  |  |  |  |  |

**Table 3. Effect of interventions on clinical outcomes**

Effect of GTN vs no GTN, and continue vs stop temporarily pre-stroke antihypertensive agents, on clinical outcomes. Data are number (%), median (interquartile range) or mean (standard deviation). Comparisons by binary logistic regression, ordinal logistic regression or multiple linear regression, with adjustment for age; sex; history of hypertension; previous stroke; diabetes mellitus; current use of nitrate therapy (not for continue vs stop); stroke severity (SSS); total anterior circulation syndrome; systolic BP; alteplase; and time from onset to randomisation.

|                            | All | GTN | No GTN | OR/β | Continue | Stop | OR/β |
|----------------------------|-----|-----|--------|------|----------|------|------|
| <i>Day 7</i>               |     |     |        |      |          |      |      |
| Patients (N)               |     |     |        |      |          |      |      |
| Death (%)                  |     |     |        |      |          |      |      |
| Death or deterioration (%) |     |     |        |      |          |      |      |
| SSS (/58)                  |     |     |        |      |          |      |      |
| Recurrence (%)             |     |     |        |      |          |      |      |
| SBP (mmHg)                 |     |     |        |      |          |      |      |
|                            |     |     |        |      |          |      |      |
| <i>Hospital events</i>     |     |     |        |      |          |      |      |
| Patients (N)               |     |     |        |      |          |      |      |
| Death (%)                  |     |     |        |      |          |      |      |
| Length of stay (days)      |     |     |        |      |          |      |      |
| Home (%)                   |     |     |        |      |          |      |      |
|                            |     |     |        |      |          |      |      |
| <i>Day 90</i>              |     |     |        |      |          |      |      |
| Patients (N)               |     |     |        |      |          |      |      |
| Death (%)                  |     |     |        |      |          |      |      |
| Modified Rankin Scale (/6) |     |     |        |      |          |      |      |



|                      |  |  |  |  |  |  |  |
|----------------------|--|--|--|--|--|--|--|
| Barthel Index (/100) |  |  |  |  |  |  |  |
| tMMSE (/16)          |  |  |  |  |  |  |  |
| TICS (/39)           |  |  |  |  |  |  |  |
| Animal naming (/∞)   |  |  |  |  |  |  |  |
| ZDS (/100)           |  |  |  |  |  |  |  |
| HUS (EQ-5D) (/1)     |  |  |  |  |  |  |  |
| EQ-VAS (/100)        |  |  |  |  |  |  |  |

**Figure 1. Death by treatment group**

Forest plot for hazard of death (calculated by Cox regression) with 95% confidence intervals at day 90 by pre-specified baseline covariates (as listed in section 4.4.3) for (a) GTN vs no GTN; and (b) continue vs stop pre-stroke antihypertensive medications.

**Figure 2. Functional outcome by treatment group**

Forest plot for odds ratio of mRS (calculated by ordinal logistic regression) with 95% confidence intervals at day 90 by pre-specified baseline covariates (as listed in section 4.4.3) for (a) GTN/no GTN; and (b) continue/stop pre-stroke antihypertensive medications.

**Figure 3. Survival by treatment group**

Kaplan-Meier plot for survival for (a) GTN/no GTN; and (b) continue/stop pre-stroke antihypertensive medications.

**Figure 4. Functional outcome by treatment group in imaging subgroups**

Forest plot for odds ratio of mRS (calculated by ordinal logistic regression) with 95% confidence intervals at day 90 for GTN/no GTN by pre-specified baseline imaging covariates: large lesion, hyperdense artery, atrophy, old lesions, WML

**APPENDIX G. PLANNED PUBLICATION: GLYCERYL TRINITRATE AND/OR CONTINUING PRE-STROKE ANTIHYPERTENSIVE MEDICATIONS IN ACUTE SPONTANEOUS INTRACEREBRAL HAEMORRHAGE**

**Authorship**

Kailash Krishnan, ..., Rob Dineen, Niki Sprigg, Joanna Wardlaw, Philip Bath

**Title**

Glyceryl trinitrate and/or continuing pre-stroke antihypertensive medications in acute spontaneous intracerebral haemorrhage.

**Authors**

To include neuroimaging adjudicators and K Krishnan.

**Aim**

To assess the effect of GTN vs no GTN, and continue vs stop temporarily pre-stroke antihypertensive medications, in patients with a final diagnosis of acute spontaneous intracerebral haemorrhage.

**Patients**

All randomised patients with acute spontaneous intracerebral haemorrhage, by intention-to-treat.

**Layout**

The publication will follow the format of the two primary publications (baseline characteristics, BP profile, clinical outcomes, SAEs, mRS distribution, survival) but will report the effect of both intervention comparisons (GTN vs no GTN, continue vs stop pre-stroke antihypertensive agents) in patients with acute spontaneous intracerebral haemorrhage as the final diagnosis. In addition, adjudicated information on baseline imaging data will be described (reporting the imaging variables in the table below), as will the effect of the interventions on day 7 imaging parameters (adjusted for baseline) where available (table).

**Imaging data**

The effect of the interventions on imaging parameters will be assessed where both baseline and day 7 data are present. The method of analysis is given for each imaging parameter.

**Table 1. Baseline ICH characteristics**

Baseline demographic, clinical and neuroimaging characteristics of patients with acute spontaneous intracerebral haemorrhage. Data are number (%), median [interquartile range] or mean (standard deviation).

|                                     | All | GTN | No GTN | Continue | Stop |
|-------------------------------------|-----|-----|--------|----------|------|
| Patients (N)                        |     |     |        |          |      |
| Country, UK (%)                     |     |     |        |          |      |
| Age (years)                         |     |     |        |          |      |
| Sex, male (%)                       |     |     |        |          |      |
| Smoking, current (%)                |     |     |        |          |      |
| Pre-morbid mRS =0 (%)               |     |     |        |          |      |
| Previous stroke (%)                 |     |     |        |          |      |
| Prior antihypertensive drug use (%) |     |     |        |          |      |
| Prior history of high BP (%)        |     |     |        |          |      |

**CONFIDENTIAL: ENOS SAP APPENDIX 20130811**

|                                          |  |  |  |  |  |
|------------------------------------------|--|--|--|--|--|
| Diabetes mellitus (%)                    |  |  |  |  |  |
| Ischaemic heart disease (%)              |  |  |  |  |  |
| Atrial fibrillation (%)                  |  |  |  |  |  |
| TACS (%)                                 |  |  |  |  |  |
| Scandinavian Stroke Scale (/58)          |  |  |  |  |  |
| Glasgow Coma Scale [/15]                 |  |  |  |  |  |
| Systolic blood pressure (mmHg)           |  |  |  |  |  |
| Diastolic blood pressure (mmHg)          |  |  |  |  |  |
| Heart rate (bpm)                         |  |  |  |  |  |
| Onset to neuroimaging (%)                |  |  |  |  |  |
| <12 hours                                |  |  |  |  |  |
| 12-24 hours                              |  |  |  |  |  |
| >24 hours                                |  |  |  |  |  |
| Location of haematoma (%)                |  |  |  |  |  |
| Lobar                                    |  |  |  |  |  |
| Basal ganglia or thalamus                |  |  |  |  |  |
| Brainstem                                |  |  |  |  |  |
| Cerebellum                               |  |  |  |  |  |
| Undetermined                             |  |  |  |  |  |
| Longest diameter (cm)                    |  |  |  |  |  |
| <3                                       |  |  |  |  |  |
| 3-5                                      |  |  |  |  |  |
| 5-8                                      |  |  |  |  |  |
| >8                                       |  |  |  |  |  |
| Leukoaraiosis                            |  |  |  |  |  |
| Mass effect                              |  |  |  |  |  |
| Remote ICH (%)                           |  |  |  |  |  |
| Previous stroke lesion (%)               |  |  |  |  |  |
| Sub-arachnoid haemorrhage                |  |  |  |  |  |
| Sub-dural haemorrhage                    |  |  |  |  |  |
| Extra-dural haemorrhage                  |  |  |  |  |  |
| Measured CT scan findings                |  |  |  |  |  |
| Volume, ABC/2 (cm <sup>3</sup> )         |  |  |  |  |  |
| Diameter, max (cm)                       |  |  |  |  |  |
| Diameter, max adjudicated (mode, cm)     |  |  |  |  |  |
| With IVH                                 |  |  |  |  |  |
| Graeb score (/12) <sup>36</sup>          |  |  |  |  |  |
| Modified Graeb score (/32) <sup>37</sup> |  |  |  |  |  |
| Volume (ml)                              |  |  |  |  |  |
| Without IVH                              |  |  |  |  |  |
| Shape (/5) <sup>53</sup>                 |  |  |  |  |  |
| Shape index                              |  |  |  |  |  |
| Density (/5) <sup>53</sup>               |  |  |  |  |  |
| Mean density                             |  |  |  |  |  |
| SD                                       |  |  |  |  |  |
| Density index                            |  |  |  |  |  |

bpm: beats per minute

**Table 2. Effect of interventions on imaging outcomes at day 7**

Effect of GTN vs no GTN, and continue vs stop temporarily pre-stroke antihypertensive agents, on imaging outcomes at day 7. Data are number (%), median (interquartile range) or mode. Comparisons by binary logistic regression, ordinal logistic regression or multiple linear regression, with adjustment for age; sex; history of hypertension; previous stroke; diabetes mellitus; current use of nitrate therapy (not for continue vs stop); stroke severity (SSS); total anterior circulation syndrome; systolic BP; baseline variable, and time from onset to randomisation.

| Imaging parameter                | GTN | No GTN | Difference (95% CI) | p | Continue | Stop | Difference (95% CI) | p |
|----------------------------------|-----|--------|---------------------|---|----------|------|---------------------|---|
| Patients (N)                     |     |        |                     |   |          |      |                     |   |
| Volume (ABC/2), absolute (ml)    |     |        |                     |   |          |      |                     |   |
| Volume (ABC/2), relative (%)     |     |        |                     |   |          |      |                     |   |
| Diameter, max (cm)               |     |        |                     |   |          |      |                     |   |
| Diameter, max - adjudicated (cm) |     |        |                     |   |          |      |                     |   |
| Mean radial expansion > 1mm      |     |        |                     |   |          |      |                     |   |
| No IVH, number (N)               |     |        |                     |   |          |      |                     |   |
| Shape [/5]                       |     |        |                     |   |          |      |                     |   |
| Shape index                      |     |        |                     |   |          |      |                     |   |
| Density [/5]                     |     |        |                     |   |          |      |                     |   |
| Mean density                     |     |        |                     |   |          |      |                     |   |
| Density index                    |     |        |                     |   |          |      |                     |   |
| IVH, number (N)                  |     |        |                     |   |          |      |                     |   |
| Graeb [/12]                      |     |        |                     |   |          |      |                     |   |
| Modified Graeb [/32]             |     |        |                     |   |          |      |                     |   |
| IVH volume (ml)                  |     |        |                     |   |          |      |                     |   |

**Table 3. Effect of interventions on clinical outcomes**

Effect of GTN vs no GTN, and continue vs stop temporarily pre-stroke antihypertensive agents, on clinical outcomes. Data are number (%), median (interquartile range) or mean (standard deviation). Comparisons by binary logistic regression, ordinal logistic regression or multiple linear regression, with adjustment for age; sex; history of hypertension; previous stroke; diabetes mellitus; current use of nitrate therapy (not for continue vs stop); stroke severity (SSS); total anterior circulation syndrome; systolic BP; and time from onset to randomisation.

|                            | All | GTN | No GTN | OR/β | Continue | Stop | OR/β |
|----------------------------|-----|-----|--------|------|----------|------|------|
| <i>Day 7</i>               |     |     |        |      |          |      |      |
| Patients (N)               |     |     |        |      |          |      |      |
| Death (%)                  |     |     |        |      |          |      |      |
| Death or deterioration (%) |     |     |        |      |          |      |      |
| SSS (/58)                  |     |     |        |      |          |      |      |
| Recurrence (%)             |     |     |        |      |          |      |      |
| SBP (mmHg)                 |     |     |        |      |          |      |      |

|                            |  |  |  |  |  |  |  |
|----------------------------|--|--|--|--|--|--|--|
|                            |  |  |  |  |  |  |  |
| <i>Hospital events</i>     |  |  |  |  |  |  |  |
| Patients (N)               |  |  |  |  |  |  |  |
| Death (%)                  |  |  |  |  |  |  |  |
| Length of stay (days)      |  |  |  |  |  |  |  |
| Home (%)                   |  |  |  |  |  |  |  |
|                            |  |  |  |  |  |  |  |
| <i>Day 90</i>              |  |  |  |  |  |  |  |
| Patients (N)               |  |  |  |  |  |  |  |
| Death (%)                  |  |  |  |  |  |  |  |
| Modified Rankin Scale (/6) |  |  |  |  |  |  |  |
| Barthel Index (/100)       |  |  |  |  |  |  |  |
| tMMSE (/16)                |  |  |  |  |  |  |  |
| TICS (/39)                 |  |  |  |  |  |  |  |
| Animal naming (/∞)         |  |  |  |  |  |  |  |
| ZDS (/100)                 |  |  |  |  |  |  |  |
| HUS (EQ-5D) (/1)           |  |  |  |  |  |  |  |
| EQ-VAS (/100)              |  |  |  |  |  |  |  |

**Figure 1. Death by treatment group**

Forest plot for hazard of death (calculated by Cox regression) with 95% confidence intervals at day 90 by pre-specified baseline covariates (as listed in section 4.4.3) for (a) GTN vs no GTN; and (b) continue vs stop pre-stroke antihypertensive medications.

**Figure 2. Functional outcome by treatment group**

Forest plot for odds ratio of mRS (calculated by ordinal logistic regression) with 95% confidence intervals at day 90 by pre-specified baseline covariates (as listed in section 4.4.3) for (a) GTN/no GTN; and (b) continue/stop pre-stroke antihypertensive medications.

**Figure 3. Survival by treatment group**

Kaplan-Meier plot for survival for (a) GTN/no GTN; and (b) continue/stop pre-stroke antihypertensive medications.

**APPENDIX H. PLANNED PUBLICATION: HAEMODYNAMIC EFFECTS OF GTN VERSUS NO GTN, AND CONTINUE VERSUS STOP PRE-STROKE ANTIHYPERTENSIVE MEDICATIONS**

**Authorship**

..., Philip Bath

**Title**

Effect of glyceryl trinitrate and/or continuing pre-stroke antihypertensive medications on blood pressure and other haemodynamic parameters, and relationship between changes and functional outcome.

**Aim**

To assess the effect of GTN vs no GTN, and continue vs stop temporarily pre-stroke antihypertensive medications, on blood pressure, heart rate and their derivatives in patients with acute stroke.

**Patients**

All randomised patients with acute stroke, by intention-to-treat. Haemodynamic measures will be calculated as in appendix B, section 2.2.

**Table 1. Baseline haemodynamic parameters**

Baseline haemodynamic parameters by treatment assignment. Data are number (%) or mean (standard deviation).

|                                        | All | GTN | No GTN | Continue | Stop |
|----------------------------------------|-----|-----|--------|----------|------|
| Patients (N)                           |     |     |        |          |      |
| SBP, mean (mmHg)                       |     |     |        |          |      |
| SBP, peak (mmHg)                       |     |     |        |          |      |
| SBP, intra-visit variability (mmHg)    |     |     |        |          |      |
| SBP, CV (%)                            |     |     |        |          |      |
| DBP, mean (mmHg)                       |     |     |        |          |      |
| DBP, peak (mmHg)                       |     |     |        |          |      |
| DBP, intra-visit variability (mmHg)    |     |     |        |          |      |
| DBP, CV (%)                            |     |     |        |          |      |
| HE, mean (bpm)                         |     |     |        |          |      |
| HR, peak (bpm)                         |     |     |        |          |      |
| HR, intra-visit variability (bpm)      |     |     |        |          |      |
| HR, CV (%)                             |     |     |        |          |      |
| Mean arterial pressure (MAP) (mmHg)    |     |     |        |          |      |
| Mean pressure (MP) (mmHg)              |     |     |        |          |      |
| Pulse pressure (PP) (mmHg)             |     |     |        |          |      |
| Pulse pressure index (PPI) (%)         |     |     |        |          |      |
| Rate-pressure product (RPP) (mmHg.bpm) |     |     |        |          |      |

**Table 2. Effect of interventions on haemodynamic variables**

Effect of GTN vs no GTN, and continue vs stop pre-stroke antihypertensive agents, on haemodynamic variables at day 1, and over the first 4 days of treatment. Comparison by multiple logistic regression adjusted for baseline.

|  | GTN | No GTN | Difference (95% CI) | p | Continue | Stop | Difference (95% CI) | p |
|--|-----|--------|---------------------|---|----------|------|---------------------|---|
|  |     |        |                     |   |          |      |                     |   |

**CONFIDENTIAL: ENOS SAP APPENDIX 20130811**

|                                               |  |  |  |  |  |  |  |  |
|-----------------------------------------------|--|--|--|--|--|--|--|--|
| <i>Day 1</i>                                  |  |  |  |  |  |  |  |  |
| Patients (N)                                  |  |  |  |  |  |  |  |  |
| SBP, mean (mmHg)                              |  |  |  |  |  |  |  |  |
| SBP, peak (mmHg)                              |  |  |  |  |  |  |  |  |
| SBP, intra-visit variability (mmHg)           |  |  |  |  |  |  |  |  |
| SBP, CV (%)                                   |  |  |  |  |  |  |  |  |
| DBP, mean (mmHg)                              |  |  |  |  |  |  |  |  |
| DBP, peak (mmHg)                              |  |  |  |  |  |  |  |  |
| DBP, intra-visit variability (mmHg)           |  |  |  |  |  |  |  |  |
| DBP, CV (%)                                   |  |  |  |  |  |  |  |  |
| HE, mean (bpm)                                |  |  |  |  |  |  |  |  |
| HR, peak (bpm)                                |  |  |  |  |  |  |  |  |
| HR, intra-visit variability (bpm)             |  |  |  |  |  |  |  |  |
| HR, CV (%)                                    |  |  |  |  |  |  |  |  |
| Mean arterial pressure (MAP) (mmHg)           |  |  |  |  |  |  |  |  |
| Mean pressure (MP) (mmHg)                     |  |  |  |  |  |  |  |  |
| Pulse pressure (PP) (mmHg)                    |  |  |  |  |  |  |  |  |
| Pulse pressure index (PPI) (%)                |  |  |  |  |  |  |  |  |
| Rate-pressure product (RPP) (mmHg.bpm)        |  |  |  |  |  |  |  |  |
|                                               |  |  |  |  |  |  |  |  |
| <i>Days 0-4</i>                               |  |  |  |  |  |  |  |  |
| Patients (N)                                  |  |  |  |  |  |  |  |  |
| Mean SBP across days 1-4 (mmHg)               |  |  |  |  |  |  |  |  |
| Inter-visit Variability (SBP-inter SD) (mmHg) |  |  |  |  |  |  |  |  |
| CV SBP across days 0-4 (%)                    |  |  |  |  |  |  |  |  |
| SBP peak across days 0-4 (mmHg)               |  |  |  |  |  |  |  |  |

**Figure 1. Change in SBP by 6 treatment groups**

Profile in mean SBP over 7 days of treatment by 6 treatment groups: a) GTN/continue, b) GTN/stop, c) no GTN/continue, d) no GTN/stop, e) GTN/no pre-stroke agent, f) no GTN/no pre-stroke agent. Data are mean (standard deviation). Comparison of area under curves with ANOVA with adjustment for multiple comparisons.

**Figure 2. Outcome by change in SBP**

**CONFIDENTIAL: ENOS SAP APPENDIX 20130811**

Distribution in functional outcome (mRS) at day 90, by magnitude of change in mean SBP and variability between day 1 and 0, grouped as: increase/no change, and small decrease, moderate decrease, large decrease (with the latter 3 groups divided equally into tertiles). The 'small decrease' group will act as the reference.<sup>54</sup> Data are number (%). Comparison by ordinal logistic regression adjusted for age; sex; stroke severity (SSS); total anterior circulation syndrome; stroke pathological type (unknown, IS, ICH); treated with rt-PA prior to randomisation; and time from onset to randomisation.

| <i>mRS</i>                   | 0 | 1 | 2 | 3 | 4 | 5 | Death |
|------------------------------|---|---|---|---|---|---|-------|
| <i>Change in SBP</i>         |   |   |   |   |   |   |       |
| Increase/no                  |   |   |   |   |   |   |       |
| Small decrease               |   |   |   |   |   |   |       |
| Moderate decrease            |   |   |   |   |   |   |       |
| Large decrease               |   |   |   |   |   |   |       |
|                              |   |   |   |   |   |   |       |
| <i>Change in variability</i> |   |   |   |   |   |   |       |
| Increase/no                  |   |   |   |   |   |   |       |
| Small decrease               |   |   |   |   |   |   |       |
| Moderate decrease            |   |   |   |   |   |   |       |
| Large decrease               |   |   |   |   |   |   |       |



**APPENDIX I. PLANNED PUBLICATION: GTN, HEADACHE AND OUTCOME**

**Authorship**

Kailash Krishnan, ..., Philip Bath

**Title**

Relationship of GTN-related headache with outcome (as in PRoFESS – submitted)

**Background**

The PRoFESS mega-trial found that the headache that occurs with dipyridamole - a nitric oxide modifying drug – is associated with less recurrence after ischaemic stroke [publication submitted]. Since the headache that occurs with GTN is mediated by a similar mechanism, GTN-associated headaches may also be associated with subsequent outcome.

**Hypotheses**

- The presence of a headache by day 7 in patients taking GTN is associated with a better functional outcome and less recurrence than those with out a headache.
- The presence of a headache by day 7 in patients taking control is not associated with outcome.

**Patients**

All ENOS patients who received at least their first treatment (GTN/no GTN), who have information on headache (yes/no) at day 7, and who have functional outcome (mRS) recorded at day 90. SAEs for headache within the first 7 days will be validated against data for headache on the day 7 form.

**Table 1. Baseline table**

Baseline characteristics for patients with and without a headache by day 7, by treatment group. Data are number (%) or mean (standard deviation). Comparison by Chi-square or t test

|                                 | GTN |    | No  |    | 2p  |    |
|---------------------------------|-----|----|-----|----|-----|----|
|                                 | Yes | No | Yes | No | GTN | 2p |
| Headache                        |     |    |     |    |     |    |
| N                               |     |    |     |    |     |    |
| Age (years)                     |     |    |     |    |     |    |
| Sex, male (%)                   |     |    |     |    |     |    |
| Smoker, current (%)             |     |    |     |    |     |    |
| Alcohol, excess (%)             |     |    |     |    |     |    |
| Hypertension (%)                |     |    |     |    |     |    |
| Diabetes (%)                    |     |    |     |    |     |    |
| Stroke (%)                      |     |    |     |    |     |    |
| Ischaemic heart disease (%)     |     |    |     |    |     |    |
| Atrial fibrillation (%)         |     |    |     |    |     |    |
| Peripheral vascular disease (%) |     |    |     |    |     |    |
| Severity (SSS, /58)             |     |    |     |    |     |    |
| TACS (%)                        |     |    |     |    |     |    |
| SBP (mmHg)                      |     |    |     |    |     |    |
| DBP (mmHg)                      |     |    |     |    |     |    |
| Heart rate (bpm)                |     |    |     |    |     |    |

**Table 2. Outcome table**

Relationship between outcome and presence of a headache by day 7, by treatment group. Data are number (%) or mean (standard deviation), and odds ratio or  $\beta$ -

**CONFIDENTIAL: ENOS SAP APPENDIX 20130811**

coefficient (95% confidence intervals). Comparison within treatment groups by binary logistic regression, ordinal logistic regression, multiple linear regression or Cox regression.

|                            | GTN |    | OR/ $\beta$ | No  | GTN | OR/ $\beta$ |
|----------------------------|-----|----|-------------|-----|-----|-------------|
|                            | Yes | No |             | Yes | No  |             |
| Headache                   |     |    |             |     |     |             |
| <i>Day 7</i>               |     |    |             |     |     |             |
| Patients (N)               |     |    |             |     |     |             |
| Death (%)                  |     |    |             |     |     |             |
| Deterioration or death (%) |     |    |             |     |     |             |
| <i>Ischaemic stroke</i>    |     |    |             |     |     |             |
| Recurrence (%)             |     |    |             |     |     |             |
| sICH (%)                   |     |    |             |     |     |             |
| SSS (/58)                  |     |    |             |     |     |             |
|                            |     |    |             |     |     |             |
| <i>Hospital events</i>     |     |    |             |     |     |             |
| Patients (N)               |     |    |             |     |     |             |
| Length of stay (days)      |     |    |             |     |     |             |
| Death (%)                  |     |    |             |     |     |             |
|                            |     |    |             |     |     |             |
| <i>Day 90</i>              |     |    |             |     |     |             |
| Patients (N)               |     |    |             |     |     |             |
| Death (%)                  |     |    |             |     |     |             |
| Modified Rankin Scale (/6) |     |    |             |     |     |             |
| Barthel Index (/100)       |     |    |             |     |     |             |
| tMMSE (/16)                |     |    |             |     |     |             |
| TICS (/100)                |     |    |             |     |     |             |
| Animal naming (/∞)         |     |    |             |     |     |             |
| ZDS (/100)                 |     |    |             |     |     |             |
| HUS (EQ-5D) (/1)           |     |    |             |     |     |             |
| EQ-VAS (/100)              |     |    |             |     |     |             |

**Figure 1. Survival**

Survival curves for patients with and without headache by day 7, by treatment group. Comparison within treatment groups by Cox regression.

**Figure 2. Functional outcome**

Modified Rankin Scale at day 90 for patients with and without headache by day 7, by treatment group. Data are number (%). Comparison within treatment groups by ordinal logistic regression.

| mRS           | 0 | 1 | 2 | 3 | 4 | 5 | Death |
|---------------|---|---|---|---|---|---|-------|
| <i>GTN</i>    |   |   |   |   |   |   |       |
| Headache      |   |   |   |   |   |   |       |
| No headache   |   |   |   |   |   |   |       |
|               |   |   |   |   |   |   |       |
| <i>No GTN</i> |   |   |   |   |   |   |       |
| Headache      |   |   |   |   |   |   |       |
| No headache   |   |   |   |   |   |   |       |

**APPENDIX J. PLANNED PUBLICATION: EFFECT OF GTN ON FEEDING STATUS**

**Authorship**

..., Shaheen Hamdy, David Smithard, David Cohen, ... Niki Sprigg, Philip Bath

**Title**

Effect of transdermal glyceryl trinitrate on feeding status at day 7 after stroke, and relationship of feeding status with functional outcome: results from the 'Efficacy of Nitric Oxide in Stroke' (ENOS) trial.

**Hypothesis**

GTN relaxes smooth muscle and therefore may improve the oesophageal phase of swallowing. A small/pilot randomised trial of nifedipine, a calcium channel blocker that also relaxes oesophageal smooth muscle, reported potentially beneficial effects.<sup>55</sup>

**Patients**

Patients in ENOS with information on feeding status at both baseline and day 7, and a final diagnosis of strokes. Analysis by intention-to-treat.

Feeding status is defined on a 6-level ordered categorical scale (normal diet, soft diet, nasogastric tube fed, PEG-tube fed, iv/sc fluids, no feeding/fluids).

Since dysphagia was not directly assessed, dysphagia is defined clinically as patients who cannot take fluids/food orally, i.e.:

- Not dysphagic/oral feeding: normal diet, soft diet
- Dysphagic/no oral feeding: NGT-feeding, PEG/RIG-feeding, iv/sc fluids or no feeding/fluids
- Missing data - No information on feeding status

**Table 1. Baseline data**

Characteristics of patients with and without clinical dysphagia at baseline. Data are number (%) or mean (standard deviation). Comparison of patients who have versus do not have oral feeding by Chi-square test or t test.

|                                 | All | GTN | No GTN | No oral feeding | Oral feeding | Difference (95% CI) | 2p |
|---------------------------------|-----|-----|--------|-----------------|--------------|---------------------|----|
| Number of participants          |     |     |        |                 |              |                     |    |
| Age (years)                     |     |     |        |                 |              |                     |    |
| Sex, male (%)                   |     |     |        |                 |              |                     |    |
| Stroke, previous (%)            |     |     |        |                 |              |                     |    |
| Hypertension (%)                |     |     |        |                 |              |                     |    |
| Ischaemic heart disease (%)     |     |     |        |                 |              |                     |    |
| Scandinavian Stroke Scale (/58) |     |     |        |                 |              |                     |    |
| Systolic blood pressure (mmHg)  |     |     |        |                 |              |                     |    |
| Ischaemic stroke (%)            |     |     |        |                 |              |                     |    |
| Time to randomisation (hours)   |     |     |        |                 |              |                     |    |
| Stroke syndrome (%)             |     |     |        |                 |              |                     |    |
| TACS                            |     |     |        |                 |              |                     |    |
| PACS                            |     |     |        |                 |              |                     |    |
| POCS                            |     |     |        |                 |              |                     |    |
| LACS                            |     |     |        |                 |              |                     |    |
| Stroke type, ischaemic (%)      |     |     |        |                 |              |                     |    |

**CONFIDENTIAL: ENOS SAP APPENDIX 20130811**

|                                 |  |  |  |   |   |  |   |
|---------------------------------|--|--|--|---|---|--|---|
| Feeding status (%)              |  |  |  |   |   |  |   |
| Normal diet                     |  |  |  | - |   |  | - |
| Soft diet                       |  |  |  | - |   |  | - |
| NGT-fed                         |  |  |  |   | - |  | - |
| PEG-fed                         |  |  |  |   | - |  | - |
| Intravenous/subcutaneous fluids |  |  |  |   | - |  | - |
| No feeding fluids               |  |  |  |   | - |  | - |

**Table 2a. Change in feeding status**

Change in feeding status from baseline to day 7 for patients randomised to GTN. Data are number (%).

| Baseline          | Normal diet | Soft diet | NGT-fed | PEG-fed | Iv/sc fluids | No feeding/fluids | Missing data |
|-------------------|-------------|-----------|---------|---------|--------------|-------------------|--------------|
| Day 7             |             |           |         |         |              |                   |              |
| Normal diet       |             |           |         |         |              |                   |              |
| Soft diet         |             |           |         |         |              |                   |              |
| NGT-fed           |             |           |         |         |              |                   |              |
| PEG-fed           |             |           |         |         |              |                   |              |
| Iv/sc fluids      |             |           |         |         |              |                   |              |
| No feeding/fluids |             |           |         |         |              |                   |              |
| Death             |             |           |         |         |              |                   |              |
| Missing data      |             |           |         |         |              |                   |              |

**Table 2b. Change in feeding status**

Change in feeding status from baseline to day 7 for patients randomised to no GTN. Data are number (%).

| Baseline          | Normal diet | Soft diet | NGT-fed | PEG-fed | Iv/sc fluids | No feeding/fluids | Missing data |
|-------------------|-------------|-----------|---------|---------|--------------|-------------------|--------------|
| Day 7             |             |           |         |         |              |                   |              |
| Normal diet       |             |           |         |         |              |                   |              |
| Soft diet         |             |           |         |         |              |                   |              |
| NGT-fed           |             |           |         |         |              |                   |              |
| PEG-fed           |             |           |         |         |              |                   |              |
| Iv/sc fluids      |             |           |         |         |              |                   |              |
| No feeding/fluids |             |           |         |         |              |                   |              |
| Death             |             |           |         |         |              |                   |              |
| Missing data      |             |           |         |         |              |                   |              |

**Table 3 Outcomes by GTN/no GTN**

Effect of GTN vs no GTN on feeding status at day 7 in subgroups defined at baseline. Data are odds ratio (95% confidence intervals) and interaction test. Comparison by ordinal logistic regression. This table may be presented as a Forest plot.

| Variable | GTN | No GTN | OR (95% CI) | Interaction p |
|----------|-----|--------|-------------|---------------|
| Age, ≤70 |     |        |             |               |
| Age, >70 |     |        |             | -             |

**CONFIDENTIAL: ENOS SAP APPENDIX 20130811**

|                                |  |  |  |   |
|--------------------------------|--|--|--|---|
| Sex, female                    |  |  |  |   |
| Sex, male                      |  |  |  | - |
| Previous stroke, no            |  |  |  |   |
| Previous stroke, yes           |  |  |  | - |
| Stroke syndrome, LACS          |  |  |  |   |
| Stroke syndrome, PACS          |  |  |  | - |
| Stroke syndrome, POCS          |  |  |  | - |
| Stroke syndrome, TACS          |  |  |  | - |
| Stroke severity, SSS >40       |  |  |  |   |
| Stroke severity, SSS 30-40     |  |  |  | - |
| Stroke severity, SSS <30       |  |  |  | - |
| Stroke, ischaemic              |  |  |  |   |
| Stroke, ICH                    |  |  |  | - |
| Feeding, oral                  |  |  |  |   |
| Feeding, not oral              |  |  |  | - |
| Time to randomisation, ≤6      |  |  |  |   |
| Time to randomisation, 6.1-12  |  |  |  | - |
| Time to randomisation, 12.1-24 |  |  |  | - |
| Time to randomisation, 24.1-36 |  |  |  | - |
| Time to randomisation, 36.1-48 |  |  |  | - |
| Treatment, alteplase           |  |  |  |   |
| Treatment, no alteplase        |  |  |  | - |
| All patients                   |  |  |  |   |

**Table 4. Outcomes by dysphagia/no dysphagia**

Comparison of outcomes at days 7 and 90 by swallowing status at baseline. Data are number (%) or mean (standard deviation), and odds ratio/ $\beta$ -coefficient (95% confidence intervals). Comparison by binary logistic regression, ordinal logistic regression, or multiple linear regression, with adjustment for age, sex, previous stroke, severity, stroke pathological type, time, treatment assignment (GTN/no GTN).

|                            | N | All patients | No oral feeding | Oral feeding | OR/ $\beta$ |
|----------------------------|---|--------------|-----------------|--------------|-------------|
| <i>Day 7</i>               |   |              |                 |              |             |
| Patients (N)               |   |              |                 |              |             |
| Death (%)                  |   |              |                 |              |             |
| Death or deterioration (%) |   |              |                 |              |             |
| SSS (/58)                  |   |              |                 |              |             |
| Recurrence (%)             |   |              |                 |              |             |
| SAEs, all (%)              |   |              |                 |              |             |
| Pneumonia                  |   |              |                 |              |             |
|                            |   |              |                 |              |             |
| <i>Hospital events</i>     |   |              |                 |              |             |
| Patients (N)               |   |              |                 |              |             |
| Death (%)                  |   |              |                 |              |             |
| Length of stay (days)      |   |              |                 |              |             |
| Home (%)                   |   |              |                 |              |             |
|                            |   |              |                 |              |             |
| <i>Day 90</i>              |   |              |                 |              |             |
| Patients (N)               |   |              |                 |              |             |
| Death (%)                  |   |              |                 |              |             |
| Modified Rankin Scale (/6) |   |              |                 |              |             |

|                      |  |  |  |  |  |
|----------------------|--|--|--|--|--|
| Barthel Index (/100) |  |  |  |  |  |
| tMMSE (/16)          |  |  |  |  |  |
| TICS (/39)           |  |  |  |  |  |
| Animal naming (/∞)   |  |  |  |  |  |
| ZDS (/100)           |  |  |  |  |  |
| HUS (EQ-5D) (/1)     |  |  |  |  |  |
| EQ-VAS (/100)        |  |  |  |  |  |
| SAEs, all (%)        |  |  |  |  |  |
| Pneumonia            |  |  |  |  |  |

**Figure 1. Feeding status at day 7**

Shift in feeding status at day 7 by treatment with GTN vs no GTN. Data are number (%). Comparison by ordinal logistic regression adjusted for age, sex, stroke severity (SSS), TACS, stroke pathological type (unknown, IS, ICH), SBP, time between stroke and randomisation, and baseline feeding status.

| Feeding status | Normal diet | Soft diet | NGT-fed | PEG-fed | Iv/sc fluids | No feeding/fluids |
|----------------|-------------|-----------|---------|---------|--------------|-------------------|
| GTN            |             |           |         |         |              |                   |
| No GTN         |             |           |         |         |              |                   |

**Figure 2. Modified Rankin Scale at day 90**

Shift in modified Rankin Scale at day 90 between patients who were dysphagic (no oral feeding) versus those who were not (oral feeding). Data are number (%). Comparison by ordinal logistic regression adjusted for age, sex, stroke severity (SSS), TACS, stroke pathological type (ICH, ischaemic), SBP, time for onset to randomisation, baseline feeding status and treatment assignment.

| mRS          | 0 | 1 | 2 | 3 | 4 | 5 | Death |
|--------------|---|---|---|---|---|---|-------|
| Dysphagia    |   |   |   |   |   |   |       |
| No dysphagia |   |   |   |   |   |   |       |

**Figure 3. Dysphagia in sub-groups**

Forrest plot of feeding status in pre-specified sub-groups, as listed in table 3.

**Figure 4. Survival**

Survival curve for dysphagia vs no dysphagia for (a) all patients to 100 days, and (b) UK patients to 4000 days. Comparisons by Cox regression adjusted for age, sex, stroke severity (SSS), TACS, stroke pathological type (ICH, ischaemic), SBP, time between stroke and randomisation, baseline feeding status and treatment assignment.

**APPENDIX K. PLANNED PUBLICATION: SPONTANEOUS INTRACEREBRAL HAEMORRHAGE BETWEEN DIFFERENT WORLD REGIONS**

**Authorship**

Kailash Krishnan, ..., Niki Sprigg, Joanna Wardlaw, Philip Bath

**Title**

Comparison of acute spontaneous intracerebral haemorrhage between different world regions: patients, haematoma and outcomes in the ENOS trial.

**Authors**

To include neuroimaging adjudicators and K Krishnan.

**Aim**

To compare patients and haematoma characteristics, and outcomes, between different regions of the world. Approaches used in previous publications comparing stroke outcomes between countries <sup>46,48,56</sup> will be followed.

**Patients**

All randomised patients with acute spontaneous intracerebral haemorrhage, by intention-to-treat:

- a) Africa: Egypt
- b) America, north: Canada
- c) Asia, east: China, Hong Kong
- d) Asia, south: India, Sri Lanka
- e) Asia, south-east: Malaysia, Philippines, Singapore
- f) Australasia: Australia, New Zealand
- g) British Isles: Eire, UK
- h) Europe: Denmark, Georgia, Greece, Italy, Norway, Poland, Romania, Spain, Sweden

**Table 1. Baseline ICH characteristics**

Baseline demographic, clinical and neuroimaging characteristics of patients with spontaneous intracerebral haemorrhage. Data are number (%), median [interquartile range] or mean (standard deviation).

|                           | All | Africa | America, north | Asia east | Asia south | Asia south-east | Austral-<br>asia | British<br>Isles | Europe |
|---------------------------|-----|--------|----------------|-----------|------------|-----------------|------------------|------------------|--------|
| Patients (N)              |     |        |                |           |            |                 |                  |                  |        |
| Age (years)               |     |        |                |           |            |                 |                  |                  |        |
| Sex, male (%)             |     |        |                |           |            |                 |                  |                  |        |
| Smoking, current (%)      |     |        |                |           |            |                 |                  |                  |        |
| Pre-morbid mRS =0 (%)     |     |        |                |           |            |                 |                  |                  |        |
| Previous stroke (%)       |     |        |                |           |            |                 |                  |                  |        |
| Prior antiHT drug use (%) |     |        |                |           |            |                 |                  |                  |        |
| Prior history of high BP  |     |        |                |           |            |                 |                  |                  |        |

**CONFIDENTIAL: ENOS SAP APPENDIX 20130811**

|                                 |  |  |  |  |  |  |  |  |  |
|---------------------------------|--|--|--|--|--|--|--|--|--|
| (%)                             |  |  |  |  |  |  |  |  |  |
| Diabetes mellitus (%)           |  |  |  |  |  |  |  |  |  |
| Ischaemic heart disease (%)     |  |  |  |  |  |  |  |  |  |
| Atrial fibrillation (%)         |  |  |  |  |  |  |  |  |  |
| TACS (%)                        |  |  |  |  |  |  |  |  |  |
| Scandinavian Stroke Scale (/58) |  |  |  |  |  |  |  |  |  |
| Glasgow Coma Scale [/15]        |  |  |  |  |  |  |  |  |  |
| SBP (mmHg)                      |  |  |  |  |  |  |  |  |  |
| DBP (mmHg)                      |  |  |  |  |  |  |  |  |  |
| HR (bpm)                        |  |  |  |  |  |  |  |  |  |
| Onset to neuroimaging (%)       |  |  |  |  |  |  |  |  |  |
| <12 hours                       |  |  |  |  |  |  |  |  |  |
| 12-24 hours                     |  |  |  |  |  |  |  |  |  |
| >24 hours                       |  |  |  |  |  |  |  |  |  |
|                                 |  |  |  |  |  |  |  |  |  |
| <i>Adjudicated parameters</i>   |  |  |  |  |  |  |  |  |  |
| Location of haematoma (%)       |  |  |  |  |  |  |  |  |  |
| Lobar                           |  |  |  |  |  |  |  |  |  |
| Basal ganglia or thalamus       |  |  |  |  |  |  |  |  |  |
| Brainstem                       |  |  |  |  |  |  |  |  |  |
| Cerebellum                      |  |  |  |  |  |  |  |  |  |
| Longest diameter (cm)           |  |  |  |  |  |  |  |  |  |
| <3                              |  |  |  |  |  |  |  |  |  |
| 3-5                             |  |  |  |  |  |  |  |  |  |
| 5-8                             |  |  |  |  |  |  |  |  |  |
| >8                              |  |  |  |  |  |  |  |  |  |
| Leukoaraiosis                   |  |  |  |  |  |  |  |  |  |
| Mass effect                     |  |  |  |  |  |  |  |  |  |
| Remote ICH (%)                  |  |  |  |  |  |  |  |  |  |
| Previous stroke lesion (%)      |  |  |  |  |  |  |  |  |  |
| Sub-                            |  |  |  |  |  |  |  |  |  |



**CONFIDENTIAL: ENOS SAP APPENDIX 20130811**

|                                      |  |  |  |  |  |  |  |  |  |
|--------------------------------------|--|--|--|--|--|--|--|--|--|
| arachnoid haemorrhage                |  |  |  |  |  |  |  |  |  |
| Sub-dural haemorrhage                |  |  |  |  |  |  |  |  |  |
| Extra-dural haemorrhage              |  |  |  |  |  |  |  |  |  |
| <i>Measured CT scan findings</i>     |  |  |  |  |  |  |  |  |  |
| Volume, ABC/2 (cm <sup>3</sup> )     |  |  |  |  |  |  |  |  |  |
| Diameter, max (cm)                   |  |  |  |  |  |  |  |  |  |
| Diameter, max adjudicated (mode, cm) |  |  |  |  |  |  |  |  |  |
| With IVH                             |  |  |  |  |  |  |  |  |  |
| Graeb score (/12) <sup>36</sup>      |  |  |  |  |  |  |  |  |  |
| Volume (ml)                          |  |  |  |  |  |  |  |  |  |
| Without IVH                          |  |  |  |  |  |  |  |  |  |
| Shape (/5) <sup>53</sup>             |  |  |  |  |  |  |  |  |  |
| Density (/5) <sup>53</sup>           |  |  |  |  |  |  |  |  |  |

bpm: beats per minute

**Table 2. Functional outcome**

Comparison of functional outcome at day 90 by world region. Data are number (%), median (interquartile range) or mean (standard deviation). Comparisons Chis-square test or Kruskal-Wallis test. by binary logistic regression, ordinal logistic regression or multiple linear regression, with adjustment for age; sex; history of hypertension; previous stroke; diabetes mellitus; stroke severity (SSS); total anterior circulation syndrome; systolic BP; ICH volume; time from onset to randomisation; GTN/no GTN; and continue/stop.

|                            | Al<br>l | Afric<br>a | America<br>, north | Asia<br>east | Asia<br>sout<br>h | Asia<br>south<br>-east | Austral<br>-asia | Britis<br>h<br>Isles | Europ<br>e | p |
|----------------------------|---------|------------|--------------------|--------------|-------------------|------------------------|------------------|----------------------|------------|---|
| <i>Day 7</i>               |         |            |                    |              |                   |                        |                  |                      |            |   |
| Patients (N)               |         |            |                    |              |                   |                        |                  |                      |            |   |
| Death (%)                  |         |            |                    |              |                   |                        |                  |                      |            |   |
| Death or deterioration (%) |         |            |                    |              |                   |                        |                  |                      |            |   |
| Recurrence (%)             |         |            |                    |              |                   |                        |                  |                      |            |   |
| SSS (/58)                  |         |            |                    |              |                   |                        |                  |                      |            |   |
| SBP                        |         |            |                    |              |                   |                        |                  |                      |            |   |

|                        |  |  |  |  |  |  |  |  |  |  |
|------------------------|--|--|--|--|--|--|--|--|--|--|
| (mmHg)                 |  |  |  |  |  |  |  |  |  |  |
| SAEs (%)               |  |  |  |  |  |  |  |  |  |  |
| Cerebral oedema        |  |  |  |  |  |  |  |  |  |  |
|                        |  |  |  |  |  |  |  |  |  |  |
| <i>Hospital events</i> |  |  |  |  |  |  |  |  |  |  |
| Patients (N)           |  |  |  |  |  |  |  |  |  |  |
| Death (%)              |  |  |  |  |  |  |  |  |  |  |
| Home (%)               |  |  |  |  |  |  |  |  |  |  |
| Length of stay (days)  |  |  |  |  |  |  |  |  |  |  |
|                        |  |  |  |  |  |  |  |  |  |  |
| <i>Day 90</i>          |  |  |  |  |  |  |  |  |  |  |
| Death (%)              |  |  |  |  |  |  |  |  |  |  |
| mRS (/6)               |  |  |  |  |  |  |  |  |  |  |
| BI (/100)              |  |  |  |  |  |  |  |  |  |  |
| tMMSE (/16)            |  |  |  |  |  |  |  |  |  |  |
| TICS (/39)             |  |  |  |  |  |  |  |  |  |  |
| Animal naming (/∞)     |  |  |  |  |  |  |  |  |  |  |
| ZDS (/100)             |  |  |  |  |  |  |  |  |  |  |
| HUS (EQ-5D) (/1)       |  |  |  |  |  |  |  |  |  |  |
| EQ-VAS (/100)          |  |  |  |  |  |  |  |  |  |  |

**Figure 1. Death by country**

Forest plot for hazard of death (calculated by Cox regression) with 95% confidence intervals at day 90 by geographical region relative to the British Isles. For analyses (a) unadjusted; and (b) adjusted for age; sex; history of hypertension; previous stroke; diabetes mellitus; stroke severity (SSS); total anterior circulation syndrome; systolic BP; ICH volume; time from onset to randomisation; GTN/no GTN; and continue/stop.

**Figure 2. Functional outcome by country**

Forest plot for odds ratio of mRS (calculated by ordinal logistic regression) with 95% confidence intervals, at day 90 by geographical region relative to the British Isles. For analyses (a) unadjusted; and (b) adjusted for age; sex; history of hypertension; previous stroke; diabetes mellitus; stroke severity (SSS); total anterior circulation syndrome; systolic BP; ICH volume; time from onset to randomisation; GTN/no GTN; and continue/stop.

**Figure 3. Survival**

Kaplan-Meier plot for survival by geographical region.

**APPENDIX L. PLANNED PUBLICATION: COMPARISON OF PATIENTS WHO TOOK VERSUS DID NOT TAKE PRE-STROKE ANTIHYPERTENSIVE MEDICATIONS: BASELINE CHARACTERISTICS AND OUTCOMES**

**Authorship**

...

**Title**

Comparison of patients who took versus did not take pre-stroke antihypertensive medications: baseline characteristics and outcomes.

**Hypothesis**

Patients taking pre-stroke antihypertensive medications will have more vascular risk factors and a worse outcome than those not on such medications.

**Patients**

Patients with confirmed stroke, by intention to treat.

**Table 1. Baseline characteristics of included trials**

Description of the trials and their participants. Trials are ordered by mean time to recruitment. Data are number (%) or mean (standard deviation).

Table based on baseline data publication.

**Table 2. Outcomes**

Comparison of outcomes in patients taking versus not taking pre-stroke antihypertensive medications.

|                                         | Analysis |     |    | OR/ $\beta$ |
|-----------------------------------------|----------|-----|----|-------------|
| Pre-stroke antihypertensive medications |          | Yes | No |             |
| <i>Day 7</i>                            |          |     |    |             |
| Patients (N)                            |          |     |    |             |
| Death (%)                               |          |     |    |             |
| Death or deterioration (%)              |          |     |    |             |
| <i>Ischaemic stroke</i>                 |          |     |    |             |
| Recurrence (%)                          |          |     |    |             |
| sICH (%)                                |          |     |    |             |
| SSS (/58)                               |          |     |    |             |
|                                         |          |     |    |             |
| <i>Hospital events</i>                  |          |     |    |             |
| Patients (N)                            |          |     |    |             |
| Death (%)                               |          |     |    |             |
| Length of stay (days)                   |          |     |    |             |
|                                         |          |     |    |             |
| <i>Day 90</i>                           |          |     |    |             |
| Patients (N)                            |          |     |    |             |
| Death (%)                               |          |     |    |             |
| Modified Rankin Scale (/6)              |          |     |    |             |
| Barthel Index (/100)                    |          |     |    |             |
| tMMSE (/16)                             |          |     |    |             |
| TICS                                    |          |     |    |             |
| Animal naming (/∞)                      |          |     |    |             |
| ZDS (/100)                              |          |     |    |             |
| HUS (EQ-5D) (/1)                        |          |     |    |             |

|               |  |  |  |  |
|---------------|--|--|--|--|
| EQ-VAS (/100) |  |  |  |  |
|---------------|--|--|--|--|

**Figure 1. Modified Rankin Scale at day 90**

Shift in modified Rankin Scale at day 90 between patients who took versus did not take pre-stroke antihypertensive medications. Data are number (%). Comparison by ordinal logistic regression adjusted for age, sex, geographical region, hypertension, hyperlipidaemia, diabetes mellitus, atrial fibrillation, previous stroke, previous TIA, ischaemic heart disease, smoking, pre-morbid mRS, stroke severity (SSS), GCS, TACS, stroke pathological type (ICH, ischaemic), SBP, time for onset to randomisation, baseline feeding status, and GTN vs no GTN.

| mRS | 0 | 1 | 2 | 3 | 4 | 5 | Death |
|-----|---|---|---|---|---|---|-------|
| Yes |   |   |   |   |   |   |       |
| No  |   |   |   |   |   |   |       |

**Figure 2. Survival by day 90**

Survival curve between patients who took versus did not take pre-stroke antihypertensive medications. Comparisons by Cox regression adjusted for age, sex, geographical region, hypertension, hyperlipidaemia, diabetes mellitus, atrial fibrillation, previous stroke, previous TIA, ischaemic heart disease, smoking, pre-morbid mRS, stroke severity (SSS), GCS, TACS, stroke pathological type (ICH, ischaemic), SBP, time for onset to randomisation, baseline feeding status, and GTN vs no GTN.

**APPENDIX M. PLANNED PUBLICATION: TEMPORAL EFFECTS OF GTN ON FUNCTIONAL OUTCOME**

**Authorship**

..., Sandeep Ankolekar, Tim England, Kailash Krishnan, Parveen Rashid, Gill Sare, Niki Sprigg, Mark Willmot, Philip Bath

**Title**

Effect of transdermal glyceryl trinitrate on functional outcome in acute stroke by time to treatment: an individual patient data meta-analysis of all ultra-acute, acute, and subacute randomised trials of GTN.

**Hypothesis**

The effect of GTN on functional outcome may vary by time to treatment, as with alteplase.<sup>57</sup>

**Patients**

All patients in GTN-1/2/3, RIGHT, ENOS and any other identified randomised controlled trials of GTN,<sup>10-13</sup> by intention to treat. The publication will follow the approaches published for alteplase.<sup>57,58</sup>

**Table 1. Baseline characteristics of included trials**

Description of the trials and their participants. Trials are ordered by mean time to recruitment. Data are number (%) or mean (standard deviation).

| Trial                       | All | GTN | No GTN | GTN-1 <sup>10</sup> | GTN-2 <sup>11</sup> | GTN-3 <sup>12</sup> | RIGHT <sup>13,14</sup> | ENOS <sup>15</sup> |
|-----------------------------|-----|-----|--------|---------------------|---------------------|---------------------|------------------------|--------------------|
| GTN dose                    |     |     |        |                     |                     |                     |                        |                    |
| Onset (hr)                  |     |     |        |                     |                     |                     |                        |                    |
| Number                      |     |     |        |                     |                     |                     |                        |                    |
| Age (years)                 |     |     |        |                     |                     |                     |                        |                    |
| Sex, male (%)               |     |     |        |                     |                     |                     |                        |                    |
| Previous stroke (%)         |     |     |        |                     |                     |                     |                        |                    |
| Hypertension (%)            |     |     |        |                     |                     |                     |                        |                    |
| Diabetes mellitus (%)       |     |     |        |                     |                     |                     |                        |                    |
| Ischaemic heart disease (%) |     |     |        |                     |                     |                     |                        |                    |
| Atrial fibrillation (%)     |     |     |        |                     |                     |                     |                        |                    |
| Severity (SSS, /58)         |     |     |        |                     |                     |                     |                        |                    |
| SBP (mmHg)                  |     |     |        |                     |                     |                     |                        |                    |
| DBP (mmHg)                  |     |     |        |                     |                     |                     |                        |                    |
| Heart rate (bpm)            |     |     |        |                     |                     |                     |                        |                    |
| Ischaemic stroke (%)        |     |     |        |                     |                     |                     |                        |                    |
| OTR (hr)                    |     |     |        |                     |                     |                     |                        |                    |

**Table 2. Outcome by time**

Effect of GTN vs no GTN on outcomes by time epochs from stroke onset to randomisation (OTR). Data are odds ratio or beta coefficients (with 95% confidence intervals). Comparison between GTN vs no GTN by binary logistic regression, ordinal logistic regression, multiple regression or Cox regression, with adjustment for age, sex, severity (Scandinavian Stroke Scale), stroke pathological type (ischaemic, ICH), systolic blood pressure.

**CONFIDENTIAL: ENOS SAP APPENDIX 20130811**

| OTR (hr)                | All | ≤4 | 4.1-8 | 8.1-12 | 12.1-24 | 24.1-48 | 48.1-96 | >96 |
|-------------------------|-----|----|-------|--------|---------|---------|---------|-----|
| <i>End-of-treatment</i> |     |    |       |        |         |         |         |     |
| Patients (N)            |     |    |       |        |         |         |         |     |
| Death (%)               |     |    |       |        |         |         |         |     |
| Death/deterioration (%) |     |    |       |        |         |         |         |     |
| Recurrence (%)          |     |    |       |        |         |         |         |     |
| SSS (/58)               |     |    |       |        |         |         |         |     |
|                         |     |    |       |        |         |         |         |     |
| <i>Discharge</i>        |     |    |       |        |         |         |         |     |
| Patients (N)            |     |    |       |        |         |         |         |     |
| Death (%)               |     |    |       |        |         |         |         |     |
| Home (%)                |     |    |       |        |         |         |         |     |
| Length of stay (days)   |     |    |       |        |         |         |         |     |
|                         |     |    |       |        |         |         |         |     |
| <i>Day 90</i>           |     |    |       |        |         |         |         |     |
| Death (%)               |     |    |       |        |         |         |         |     |
| mRS (/6)                |     |    |       |        |         |         |         |     |
| BI (/100)               |     |    |       |        |         |         |         |     |
| tMMSE (/16)             |     |    |       |        |         |         |         |     |
| TICS (/39)              |     |    |       |        |         |         |         |     |
| Animal naming (/∞)      |     |    |       |        |         |         |         |     |
| ZDS (/100)              |     |    |       |        |         |         |         |     |
| HUS (EQ-5D) (/1)        |     |    |       |        |         |         |         |     |
| EQ-VAS (/100)           |     |    |       |        |         |         |         |     |

**Table 3. Numbers-needed-to-treat by time**

Numbers-needed-to-treat<sup>59</sup> by time epochs from stroke onset to randomisation (OTR). Data are NNT (with 95% confidence intervals) with adjustment for age, sex, severity (Scandinavian Stroke Scale), stroke pathological type (unknown, IS, ICH), systolic blood pressure.

| OTR (hr)      | All | ≤4 | 4.1-8 | 8.1-12 | 12.1-24 | 24.1-48 | 48.1-96 | >96 |
|---------------|-----|----|-------|--------|---------|---------|---------|-----|
| <i>Day 90</i> |     |    |       |        |         |         |         |     |
| Death         |     |    |       |        |         |         |         |     |
| mRS           |     |    |       |        |         |         |         |     |

**Figure 1. Meta-analysis of trials**

Forrest plot of meta-analysis of GTN trials.

**Figure 2. Outcome by time-to-treatment**

Relationship between outcome at day 90 and time from onset to randomisation, for (a) modified Rankin Scale (odds ratio for 7 level scale); (b) death (odds ratio); (c) Zung Depression Scale ( $\beta$ -coefficient); and (d) Health Utility Status (derived from EQ-5D,  $\beta$ -coefficient).

**Figure 3. Functional outcome**

Distribution of modified Rankin Scale for GTN vs no GTN by time from stroke to randomisation for time epochs (hours): ≤4, 4.1-8, 8.1-12, 12.1-24, 24.1-48, 48.1-96, >96.

**APPENDIX N. PLANNED PUBLICATION: CONTINUING VERSUS STOPPING PRE-STROKE ANTIHYPERTENSIVE MEDICATIONS IN ACUTE STROKE: A META-ANALYSIS OF INDIVIDUAL PATIENT DATA FROM RANDOMISED CONTROLLED TRIALS**

**Authorship**

Tom Robinson, ..., Ken Lees, Philip Bath

**Title**

Comparison of continuing or temporary stopping of pre-stroke antihypertensive medication in acute stroke: a prospective meta-analysis of individual patient data from randomised controlled trials.

**Hypothesis**

Continuing pre-stroke antihypertensive therapy lowers BP and reduces poor functional outcome as opposed to temporary stopping of such treatment.

**Patients**

Patients recruited into trials comparing continuing versus stopping pre-stroke antihypertensive agents in patients with acute stroke, with analysis by intention to treat. The publication will follow the approaches published for alteplase.<sup>57,58</sup>

**Table 1. Included trials**

Characteristics of trials comparing continuing versus stopping pre-stroke antihypertensive medication in patients with acute stroke.

|                       | Size | Recruitment time window (hrs) | Length of treatment (days) | Length of follow-up (days) | SBP range (mmHg) | Major exclusions                        |
|-----------------------|------|-------------------------------|----------------------------|----------------------------|------------------|-----------------------------------------|
| COSSACS <sup>49</sup> | 763  | < 48                          | 14                         | 180                        | >100             | Need for antihypertensive agents        |
| ENOS <sup>15</sup>    | ?    | <48                           | 7                          | 90                         | 140-220          | Need for GTN or antihypertensive agents |
| Other trial(s)?       |      |                               |                            |                            |                  |                                         |

GTN: glyceryl trinitrate

**Table 2. Baseline characteristics**

Baseline characteristics of trial participants. Data are number (%) or mean (standard deviation). Comparison by Chi-square test or ANOVA.

|                                         | COSSACS<br>49 | ENOS<br>15 | Other trial(s)<br>? | P-<br>value |
|-----------------------------------------|---------------|------------|---------------------|-------------|
| No. of patients                         |               |            |                     |             |
| Age (years)                             |               |            |                     |             |
| Sex, male (%)                           |               |            |                     |             |
| Race-ethnicity (%) [1]                  |               |            |                     |             |
| Caucasian                               |               |            |                     |             |
| Asia, east                              |               |            |                     |             |
| Asia, south                             |               |            |                     |             |
| Asia, south-east                        |               |            |                     |             |
| Other                                   |               |            |                     |             |
| Medical history (%)                     |               |            |                     |             |
| Hypertension                            |               |            |                     |             |
| Diabetes mellitus                       |               |            |                     |             |
| Hyperlipidaemia                         |               |            |                     |             |
| Atrial fibrillation                     |               |            |                     |             |
| Previous stroke                         |               |            |                     |             |
| TIA                                     |               |            |                     |             |
| Ischaemic heart disease                 |               |            |                     |             |
| Family history of stroke                |               |            |                     |             |
| Smoker, current                         |               |            |                     |             |
| Rankin Scale, pre-morbid 0              |               |            |                     |             |
| Antihypertensive agents pre-stroke      |               |            |                     |             |
| Angiotensin converting enzyme inhibitor |               |            |                     |             |
| Angiotensin receptor antagonist         |               |            |                     |             |
| Renin inhibitor                         |               |            |                     |             |
| β-receptor antagonist                   |               |            |                     |             |
| Calcium channel blocker                 |               |            |                     |             |
| Diuretic                                |               |            |                     |             |
| α-receptor antagonist                   |               |            |                     |             |
| Centrally acting                        |               |            |                     |             |
| Other                                   |               |            |                     |             |
| Number of antihypertensive agents       |               |            |                     |             |
| 1                                       |               |            |                     |             |
| 2                                       |               |            |                     |             |
| 3                                       |               |            |                     |             |
| 4                                       |               |            |                     |             |
| >4                                      |               |            |                     |             |
| Time since last BP drugs                |               |            |                     |             |
| Medications, other pre-stroke           |               |            |                     |             |
| Aspirin                                 |               |            |                     |             |
| Dipyridamole                            |               |            |                     |             |
| Clopidogrel                             |               |            |                     |             |
| Statin                                  |               |            |                     |             |
| Haemodynamic measures                   |               |            |                     |             |
| Systolic BP (mmHg)                      |               |            |                     |             |
| Diastolic BP (mmHg)                     |               |            |                     |             |



**CONFIDENTIAL: ENOS SAP APPENDIX 20130811**

|                                          |  |  |  |  |
|------------------------------------------|--|--|--|--|
| Pulse pressure (mmHg)                    |  |  |  |  |
| Systolic BP, peak (mmHg)                 |  |  |  |  |
| Systolic BP, standard deviation (mmHg)   |  |  |  |  |
| Heart rate (bpm)                         |  |  |  |  |
| Rate-pressure product (mmHg.bpm)         |  |  |  |  |
| Stroke severity, NIHSS [2]               |  |  |  |  |
| Stroke type/aetiology (%)                |  |  |  |  |
| IS [3]                                   |  |  |  |  |
| ICH                                      |  |  |  |  |
| Stroke type unknown                      |  |  |  |  |
| Non stroke                               |  |  |  |  |
| Stroke syndrome (%)                      |  |  |  |  |
| Total anterior circulation               |  |  |  |  |
| Partial anterior circulation             |  |  |  |  |
| Posterior circulation                    |  |  |  |  |
| Lacunar                                  |  |  |  |  |
| Stroke aetiology (if ischaemic) (%)      |  |  |  |  |
| Small vessel                             |  |  |  |  |
| Large artery                             |  |  |  |  |
| Cardioembolic                            |  |  |  |  |
| Other                                    |  |  |  |  |
| Carotid stenosis, ipsilateral 70-99% [4] |  |  |  |  |
| Time to randomisation (hr) (%)           |  |  |  |  |
| <12                                      |  |  |  |  |
| 13-24                                    |  |  |  |  |
| 25-48                                    |  |  |  |  |

1. ENOS: Race-ethnicity defined by country of recruitment
2. ENOS: NIHSS estimated from Scandinavian Stroke Scale <sup>35</sup>
3. Infarct: normal imaging or infarct with/without haemorrhagic transformation
4. COSSACS: Symptomatic carotid stenosis from SAE reporting carotid endarterectomy

**CONFIDENTIAL: ENOS SAP APPENDIX 20130811**

**Table 3. Outcomes**

Functional outcome and vascular events. Percentage for continue versus stop; comparison by logistic regression, or multiple regression, adjusted for trial, age, sex, severity, systolic blood pressure.

| Outcome                       | COSSACS  |      | ENOS     |      | Other trial? |      | All stroke OR (95% CI) | P-value | IS OR (95% CI) | P-value | ICH OR (95% CI) | P-value |
|-------------------------------|----------|------|----------|------|--------------|------|------------------------|---------|----------------|---------|-----------------|---------|
|                               | Continue | Stop | Continue | Stop | Continue     | Stop |                        |         |                |         |                 |         |
| Patients                      |          |      |          |      |              |      |                        |         |                |         |                 |         |
| End of treatment [1]          |          |      |          |      |              |      |                        |         |                |         |                 |         |
| Death (%)                     |          |      |          |      |              |      |                        |         |                |         |                 |         |
| Recurrence (%)                |          |      |          |      |              |      |                        |         |                |         |                 |         |
| Ischaemic                     |          |      |          |      |              |      |                        |         |                |         |                 |         |
| Haemorrhagic                  |          |      |          |      |              |      |                        |         |                |         |                 |         |
| Unknown                       |          |      |          |      |              |      |                        |         |                |         |                 |         |
| Death or deterioration (%)    |          |      |          |      |              |      |                        |         |                |         |                 |         |
| Impairment, NIHSS [2]         |          |      |          |      |              |      |                        |         |                |         |                 |         |
| Systolic BP                   |          |      |          |      |              |      |                        |         |                |         |                 |         |
| Diastolic BP                  |          |      |          |      |              |      |                        |         |                |         |                 |         |
| End of trial [3]              |          |      |          |      |              |      |                        |         |                |         |                 |         |
| Death (%)                     |          |      |          |      |              |      |                        |         |                |         |                 |         |
| mRS>2 (%)                     |          |      |          |      |              |      |                        |         |                |         |                 |         |
| Stroke (%) [4]                |          |      |          |      |              |      |                        |         |                |         |                 |         |
| Myocardial infarction (%) [4] |          |      |          |      |              |      |                        |         |                |         |                 |         |
| Vascular event (%) [5]        |          |      |          |      |              |      |                        |         |                |         |                 |         |
| Lost to follow-up (%)         |          |      |          |      |              |      |                        |         |                |         |                 |         |

1. COSSACS: 14 days; ENOS: 7 days

2. ENOS: NIHSS estimated from Scandinavian Stroke Scale <sup>40</sup>

3. COSSACS: 180 days; ENOS: 90 days

**CONFIDENTIAL: ENOS SAP APPENDIX 20130811**

4. ENOS (end of follow-up): Stroke and MI rates obtained from serious adverse events
5. Composite of vascular death, non-fatal stroke, and non-fatal myocardial infarction

### **Blood pressure profile**

Figure 1. Blood pressure during 7 days of treatment.  $\Delta$ SBP and  $\Delta$ DBP signify mean difference in systolic and diastolic blood pressure between the two groups; p values were calculated with the independent sample *t* test, and are for difference in systolic blood pressure between groups.

### **Modified Rankin Scale distribution**

Figure 2. Modified Rankin Scale (mRS) at 90 days follow-up. Distribution of mRS scores by treatment group. Comparison by ordinal logistic regression adjusted for baseline factors.

### **Primary outcome in pre-specified subgroups**

Figure 3. Subgroup analysis of effects on functional outcome at 90 days. Pre-defined subgroups are listed in section 4.4.3.

### **Survival curves**

Figure 4. Cumulative hazard of (a) death; (b) recurrence; and (c) cardiovascular events during follow-up. Cox proportional regression with adjustment for baseline covariates, hazard ratio= (95% CI - ), p= .

**REFERENCES**

1. Leonardi-Bee J, Bath PMW, Phillips SJ, Sandercock PAG, for the IST Collaborative Group. Blood pressure and clinical outcomes in the International Stroke Trial. *Stroke* 2002;33:1315-20.
2. Willmot M, Leonardi-Bee J, Bath PM. High blood pressure in acute stroke and subsequent outcome: a systematic review. *Hypertension* 2004;43:18-24.
3. Sprigg N, Gray LJ, Bath PM, et al. Relationship between outcome and baseline blood pressure and other haemodynamic measures in acute ischaemic stroke: data from the TAIST trial. *J Hypertens* 2006;24:1413-7.
4. Geeganage C, Tracy M, England T, et al. Relationship Between Baseline Blood Pressure Parameters (Including Mean Pressure, Pulse Pressure, and Variability) and Early Outcome After Stroke: Data From the Tinzaparin in Acute Ischaemic Stroke Trial (TAIST). *Stroke* 2010;23.
5. Sandset EC, Bath PM, Boysen G, et al. The angiotensin-receptor blocker candesartan for treatment of acute stroke (SCAST): a randomised, placebo-controlled double-blind trial. *Lancet* 2011;377:741-50.
6. Anderson CS, Heeley E, Huang Y, et al. Rapid blood-pressure lowering in patients with acute intracerebral hemorrhage. *N Engl J Med* 2013;368:2355-65.
7. Willmot MR, Bath PMW. The potential of nitric oxide therapeutics in stroke. *Expert Opinion Investigational Drugs* 2003;12:455-70.
8. Willmot M, Murphy S, Leonardi-Bee J, Bath P. Systematic review of nitric oxide donors and L-arginine in experimental stroke: effects on infarct size and cerebral blood flow. *Cerebrovasc Dis* 2003;16:S3 66 (abstract).
9. Butterworth RJ, Cluckie A, Jackson SHD, Buxton-Thomas M, Bath PMW. Pathophysiological assessment of nitric oxide (given as sodium nitroprusside) in acute ischaemic stroke. *Cerebrovasc Dis* 1998;8:158-65.
10. Bath PMW, Pathansali R, Iddenden R, Bath FJ. The effect of transdermal glyceryl trinitrate, a nitric oxide donor, on blood pressure and platelet function in acute stroke. *Cerebrovasc Dis* 2001;11:265-72.
11. Rashid P, Weaver C, Leonardi-Bee JA, Fletcher S, Bath FJ, Bath PMW. The effects of transdermal glyceryl trinitrate, a nitric oxide donor on blood pressure, cerebral and cardiac haemodynamics and plasma nitric oxide levels in acute stroke. *J Stroke Cerebrovasc Dis* 2003;13:143-51.
12. Willmot M, Ghadami A, Whysall B, Clarke W, Wardlaw J, Bath PM. Transdermal glyceryl trinitrate lowers blood pressure and maintains cerebral blood flow in recent stroke. *Hypertension* 2006;47:1209-15.
13. Ankolekar S FM, Renton C, Cox P, Sprigg N, Siriwardena AN, Bath PM. Feasibility of an ambulance-based stroke trial and safety of glyceryl trinitrate in ultra acute stroke: the 'Rapid Intervention with Glyceryl Trinitrate in Hypertensive Stroke Trial' (RIGHT, ISRCTN66434824). *Stroke* 2013.
14. Ankolekar S, Sare G, Geeganage C, et al. Determining the Feasibility of Ambulance-Based Randomised Controlled Trials in Patients with Ultra-Acute Stroke: Study Protocol for the "Rapid Intervention with GTN in Hypertensive Stroke Trial" (RIGHT, ISRCTN66434824). *Stroke Res Treat* 2012;2012:385753.
15. The ENOS Trial Investigators. Glyceryl trinitrate vs. control, and continuing vs. stopping temporarily prior antihypertensive therapy, in acute stroke: rationale and design of the Efficacy of Nitric Oxide in Stroke (ENOS) trial (ISRCTN99414122). *International Journal of Stroke* 2006;1:245-9.
16. Kobayashi A, Grabska K, Czlonkowska A, Gray LJ, Bath PMW. Efficacy of Nitric Oxide in Stroke - ENOS - a randomized trial - Characteristics of patients recruited in Poland. *Polish Journal of Neurology and Neursurgery* 2008;42:99-104.
17. Sare GM, Gray LJ, Wardlaw J, Chen C, Bath PMW, Investigators FtET. Is lowering blood pressure hazardous in patients with significant ipsilateral carotid stenosis and acute

## **CONFIDENTIAL: ENOS SAP GTN V1.0**

ischaemic stroke? Interim assessment in the 'Efficacy of Nitric Oxide in Stroke' Trial. *Blood Pressure Monitoring* 2009;14:20-5.

18. Ankolekar S, Renton C, Bereczki D, et al. Effect of the neutral CLOTS 1 trial on the use of graduated compression stockings in the Efficacy of Nitric Oxide Stroke (ENOS) trial. *J Neurol Neurosurg Psychiatry* 2012.
19. Whynes DK, Sprigg N, Selby J, Berge E, Bath PM. Testing for differential item functioning within the EQ-5D. *Med Decis Making* 2013;33:252-60.
20. Ildiko S SS, Jurcau A, Simion A, Sisak E, Renton C, Ellender S, Bath P. The efficacy of nitric oxide in stroke (ENOS) Trial - where do we stand in Romania? *Romanian Journal of Neurology* 2012;XI:68.
21. Weir CJ, Lees KR. Comparison of stratification and adaptive methods for treatment allocation in an acute stroke clinical trial. *StatMed* 2003;22:705-26.
22. Bath P, Lindenstrom E, Boysen G, et al. Tinzaparin in acute ischaemic stroke (TAIST): a randomised aspirin-controlled trial. *Lancet* 2001;358:702-10.
23. Bamford J, Sandercock P, Dennis M, Burn J, Warlow C. Classification and natural history of clinically identifiable subtypes of cerebral infarction. *Lancet* 1991;337:1521-6.
24. The Optimising Analysis of Stroke Trials (OAST) Collaboration. Can we improve the statistical analysis of stroke trials? Statistical re-analysis of functional outcomes in stroke trials. *Stroke* 2007;38:1911-5.
25. Bath PM, Lees KR, Schellinger PD, et al. Statistical analysis of the primary outcome in acute stroke trials *Stroke* 2012;43:1171-8.
26. The Optimising Analysis of Stroke Trials (OAST) Collaboration. Should stroke trials adjust functional outcome for baseline prognostic factors? *Stroke* 2009;40:888-94.
27. Saver JL. Novel-end point analytic techniques and interpreting shifts across the entire range of outcome scales in acute stroke trials. *Stroke* 2007.
28. Savitz SI, Lew R, Bluhmki E, Hacke W, Fisher M. Shift analysis versus dichotomization of the Modified Rankin scale outcome scores in the NINDS and ECASS-II trials. *Stroke* 2007;38:3205-12.
29. Lees KR, Zivin JA, Ashwood T, et al. NXY-059 for acute ischemic stroke. *New England Journal of Medicine* 2006;354:588-99.
30. Shuaib A, Lees KR, Lyden P, et al. NXY-059 for the treatment of acute ischemic stroke. *New England Journal of Medicine* 2007;357:562-71.
31. Hacke W, Kaste M, Bluhmki E, et al. Thrombolysis with alteplase 3 to 4.5 hours after acute ischemic stroke. *New England Journal of Medicine* 2008;359:1317-29.
32. Rankin J. Cerebral vascular accidents in patients over the age of 60. 2. Prognosis. *Scottish Medical Journal* 1957;2:200-15.
33. Tilley BC, Marler J, Geller NL, et al. Use of a global test for multiple outcomes in stroke trials with application to the National Institute of Neurological Disorders and Stroke t-PA stroke trial. *Stroke* 1996;27:2136-42.
34. Intravenous Magnesium Efficacy in Stroke (IMAGES) Study Investigators. Magnesium for acute stroke (Intravenous Magnesium Efficacy in Stroke trial): randomised controlled trial. *Lancet* 2004;363:439.
35. Gray LJ, Ali M, Lyden PD, Bath PM. Interconversion of the National Institutes of Health Stroke Scale and Scandinavian Stroke Scale in acute stroke. *J Stroke Cerebrovasc Dis* 2009;18:466-8.
36. Graeb DA, Robertson WD, Lapointe JS, Nugent RA, Harrison PB. COMPUTED TOMOGRAPHIC DIAGNOSIS OF INTRAVENTRICULAR HEMORRHAGE - ETIOLOGY AND PROGNOSIS. *Radiology* 1982;143.
37. Morgan TC DJ, Spengler D, Lees KR, Aldrich C, Misha NK, Lane K, Quinn TJ, Deiner-Wet M, Weir CJ, Higgins P, Refferty M, Kinsley K, Ziai W, Awad I, Walters MR, Hanley D. The Modified Graeb Score: An enhanced Tool for Intraventricular Hemorrhage Measurement and Prediction of Functional Outcome. *Stroke* 2013;44:635-41.
38. Cheung K, Oemar M, Oppe M, Rabin R. EQ-5D User Guide: Basic information on how to use EQ-5D In. 2 ed. <http://www.euroqol.org>; EuroQol Group; 2009.

## **CONFIDENTIAL: ENOS SAP GTN V1.0**

39. Sandercock P, Wardlaw JM, Lindley RI, et al. The benefits and harms of intravenous thrombolysis with recombinant tissue plasminogen activator within 6 h of acute ischaemic stroke (the third international stroke trial [IST-3]): a randomised controlled trial. *Lancet* 2012;379:2352-63.
40. Gray LJ, Ali M, Lyden PD, Bath PMW, Collaboration ftVISTA. Interconversion of the National Institutes of Health Stroke Scale and Scandinavian Stroke Scale in acute stroke. *Journal of Stroke and Cerebrovascular Diseases* 2009;18:466-8.
41. Wardlaw J, Bath P, Sandercock P, et al. The NeuroGrid stroke exemplar clinical trial protocol. *International Journal of Stroke* 2007;2:63-9.
42. Sare GM, Gray LJ, Wardlaw J, Chen C, Bath PMW, ENOS Trial Investigators. Is lowering blood pressure hazardous in patients with significant ipsilateral carotid stenosis and acute ischaemic stroke? Interim assessment in the 'Efficacy of Nitric Oxide in Stroke' Trial. *Blood Pressure Monitoring* 2009;14:20-5.
43. De Silva DA, Omar E, Manzano JJ, et al. Comparison of small volume infarcts of lacunar and non-lacunar etiologies. *Int J Stroke* 2013;8:E24-5.
44. Sandset EC MG, Bath PMW, Kjeldsen SE, Berge E: Scandinavian Candesartan Acute Stroke Trial (SCAST) Study Group. Relationship between change in blood pressure in acute stroke and risk of early adverse events and poor outcome. *Stroke* 2012;43:2108-14.
45. Gray LJ, Sprigg N, Rashid PA, Willmot M, Bath PMW. Effect of nitric oxide donors on blood pressure and pulse pressure in acute and sub-acute stroke. *Journal of Stroke and Cerebrovascular Diseases* 2006;15:245-9.
46. Weir NU, Sandercock PAG, Lewis SC, Signorini DF, Warlow CP, Group obotIC. Variations between countries in outcome after stroke in the International Stroke trial (IST). *Stroke* 2001;32:1370-7.
47. Bath P, Soerensen P, Lindenstrom E. Outcome after stroke varies between countries: data from the 'Tinzaparin in Acute Ischaemic Stroke Trial' (TAIST). *Cerebrovasc Dis* 2001;11 (suppl 4):7 (abstract).
48. Ali M, Atula S, Bath PMW, et al. Stroke outcome in clinical trial patients deriving from different countries. *Stroke* 2008.
49. Robinson TG, Potter JF, Ford GA, et al. Effects of antihypertensive treatment after acute stroke in the Continue or Stop Post-Stroke Antihypertensives Collaborative Study (COSSACS): a prospective, randomised, open, blinded-endpoint trial. *Lancet Neurol* 2010;9:767-75.
50. Bath PMW, Willmot M, Bath-Hextall FJ, Leonardie-Bee J. Nitric oxide donors (nitrates), L-arginine, or nitric oxide synthase inhibitors in acute ischaemic stroke *Cochrane Database of Systematic Reviews* 2002.
51. Geeganage C, Bath PM. Vasoactive drugs for acute stroke. *Cochrane Database Syst Rev* 2010:CD002839.
52. Geeganage C, Bath PMW. Interventions for deliberately altering blood pressure in acute stroke (Review). *The Cochrane Library* 2008.
53. Sheth KN, Cushing TA, Wendell L, et al. Comparison of hematoma shape and volume estimates in warfarin versus non-warfarin-related intracerebral hemorrhage. *Neurocrit Care* 2010;12:30-4.
54. Sandset EC, Murray GD, Bath PM, Kjeldsen SE, Berge E. Relation between change in blood pressure in acute stroke and risk of early adverse events and poor outcome. *Stroke* 2012;43:2108-14.
55. Perez I, Smithard DG, Davies H, Kalra L. Pharmacological treatment of dysphagia in stroke. *Dysphagia* 1998;13:12-6.
56. Gray LJ, Sprigg N, Bath PM, et al. Significant variation in mortality and functional outcome after acute ischaemic stroke between western countries: data from the tinzaparin in acute ischaemic stroke trial (TAIST). *J Neurol Neurosurg Psychiatry* 2006;77:327-33.
57. Lees KR, Bluhmki E, von Kummer R, et al. Time to treatment with intravenous alteplase and outcome in stroke: an updated pooled analysis of ECASS, ATLANTIS, NINDS, and EPITHET trials. *Lancet* 2010;375:1695-703.

**CONFIDENTIAL: ENOS SAP GTN V1.0**

58. Details of a prospective protocol for a collaborative meta-analysis of individual participant data from all randomized trials of intravenous rt-PA vs. control: statistical analysis plan for the Stroke Thrombolysis Trialists' Collaborative meta-analysis. *Int J Stroke* 2013;8:278-83.

59. Optimising the Analysis of Stroke Trials (OAST) Collaboration. Calculation of Numbers-Needed-to-Treat (NNT) in parallel group trials assessing ordinal outcomes: Case examples from acute stroke and stroke prevention *International Journal of Stroke* 2011;6:472-9.
